# Supplementary material for: Evaluation of the ‘Colli-Pee’, a first-void urine collection device for self-sampling at home for the detection of sexually transmitted infections, versus a routine clinic-based urine collection in a one-to-one comparison study design: efficacy and acceptability among MSM in Belgium
Source: PubMed Central journal article supplement — BMJ Open. 2019 Apr 3;9(4):e028145. doi: 10.1136/bmjopen-2018-028145 (PMC6500257; doi:10.1136/bmjopen-2018-028145), 2019-04-03

# BMJ Open

BMJ Open is committed to open peer review. As part of this commitment we make the peer review history of every article we publish publicly available.

When an article is published we post the peer reviewers' comments and the authors' responses online. We also post the versions of the paper that were used during peer review. These are the versions that the peer review comments apply to.

The versions of the paper that follow are the versions that were submitted during the peer review process. They are not the versions of record or the final published versions. They should not be cited or distributed as the published version of this manuscript.

BMJ Open is an open access journal and the full, final, typeset and author-corrected version of record of the manuscript is available on our site with no access controls, subscription charges or pay-per-view fees (<http://bmjopen.bmj.com>).

If you have any questions on BMJ Open's open peer review process please email [info.bmjopen@bmj.com](mailto:info.bmjopen@bmj.com)

# BMJ Open

## COLLI-PEE™, A FIRST-VOID URINE COLLECTION DEVICE FOR SELF-SAMPLING AT HOME FOR SEXUALLY TRANSMITTED INFECTIONS: EFFICACY AND ACCEPTABILITY AMONG MSM IN BELGIUM

|                               |                                                                                                                                                                                                                                                                                                                                                                                                                                                                                                                                                                                                                                                                             |
|-------------------------------|-----------------------------------------------------------------------------------------------------------------------------------------------------------------------------------------------------------------------------------------------------------------------------------------------------------------------------------------------------------------------------------------------------------------------------------------------------------------------------------------------------------------------------------------------------------------------------------------------------------------------------------------------------------------------------|
| Journal:                      | <i>BMJ Open</i>                                                                                                                                                                                                                                                                                                                                                                                                                                                                                                                                                                                                                                                             |
| Manuscript ID                 | bmjopen-2018-028145                                                                                                                                                                                                                                                                                                                                                                                                                                                                                                                                                                                                                                                         |
| Article Type:                 | Research                                                                                                                                                                                                                                                                                                                                                                                                                                                                                                                                                                                                                                                                    |
| Date Submitted by the Author: | 23-Nov-2018                                                                                                                                                                                                                                                                                                                                                                                                                                                                                                                                                                                                                                                                 |
| Complete List of Authors:     | De Baetselier, Irith; Institute of Tropical Medicine, Department of Clinical Sciences<br>Smet, Hilde; Institute of Tropical Medicine, Department of Clinical Sciences<br>Abdellati, Said; Institute of Tropical Medicine, Department of Clinical Sciences<br>Cuylaerts, Vicky; Institute of Tropical Medicine, Department of Clinical Sciences<br>De Deken, Bénédicte; Institute of Tropical Medicine, Department of Clinical Sciences<br>Reyniers, Thijs; Institute of Tropical Medicine, Department of Public Health<br>Vuylsteke, Bea; Institute of Tropical Medicine, Public Health<br>Crucitti, Tania; Institute of Tropical Medicine, Department of Clinical Sciences |
| Keywords:                     | neisseria gonorrhoeae, chlamydia trachomatis, screening, urine, pre-exposure prophylaxis, MSM                                                                                                                                                                                                                                                                                                                                                                                                                                                                                                                                                                               |
|                               |                                                                                                                                                                                                                                                                                                                                                                                                                                                                                                                                                                                                                                                                             |

SCHOLARONE™  
Manuscripts

1  
2  
3  
4 **COLLI-PEE™, A FIRST-VOID URINE COLLECTION DEVICE FOR SELF-**  
5  
6  
7 **SAMPLING AT HOME FOR SEXUALLY TRANSMITTED INFECTIONS:**  
8  
9  
10  
11 **EFFICACY AND ACCEPTABILITY AMONG MSM IN BELGIUM**  
12  
13  
14  
15  
16

17 Authors: De Baetselier Irith<sup>1</sup>, Smet Hilde<sup>1</sup>, Abdellati Saïd<sup>1</sup>, De Deken Bénédicte<sup>1</sup>, Cuylaerts Vicky<sup>1</sup>,  
18  
19 Reyniers Thijs<sup>2</sup>, Vuylsteke Bea<sup>2</sup>, Crucitti Tania<sup>1</sup>  
20  
21

22 <sup>1</sup>Institute of Tropical Medicine, Department of Clinical Sciences, HIV/STI Reference Laboratory,  
23  
24 Antwerp, Belgium  
25

26  
27 <sup>2</sup>Institute of Tropical Medicine, Department of Public Health, HIV Sexual Unit, Antwerp, Belgium  
28  
29

30 Corresponding Author Details:  
31

32  
33 Irith De Baetselier MSc.  
34

35 Institute of Tropical Medicine  
36

37 Nationalestraat 155  
38

39 2000 Antwerp  
40

41 Belgium  
42  
43

44 Email: [idebaetselier@itg.be](mailto:idebaetselier@itg.be)  
45

46 Telephone: +3232475444  
47  
48  
49  
50

51 Wordcount excluding title page, abstract, references, figures and tables: 3145  
52  
53  
54  
55  
56  
57  
58  
59  
60

## ABSTRACT:

Objectives: Pre-exposure prophylaxis (PrEP) users are screened bi-annual for Sexually Transmitted Infections (STIs). A novel device, called the Colli-Pee™, collects first-void urine in a standardized way and the collector tube can be easily delivered by regular post to a certified laboratory. The aim of the study was a one-to-one comparison between the STI test results obtained with the urine collected in the clinic, versus urine collected at home in a real-life setting by Men who have Sex with Men (MSM) in Belgium. The usability and acceptability of the Colli-Pee™ device by the users was also evaluated.

Design: A single-site nested sub-study in a prospective PrEP demonstration project (Be-PrEP-ared) among MSM in Belgium.

Participants: A total of 473 home-based samples from 213 MSM were received with a mean age of 38.5 years.

Interventions: Participants were requested to collect a urine sample at home using the Colli-Pee™ device and to send it to the laboratory via regular mail.

Primary and secondary outcome measures: The presence of *Chlamydia trachomatis* (CT), *Neisseria gonorrhoeae* (NG), *Mycoplasma genitalium* (MG) and *Trichomonas vaginalis* (TV) was determined using molecular amplification assays. Agreement between test results of samples collected at the clinic and collected at home were evaluated using Cohen's kappa statistic.

Results: *Trichomonas vaginalis* was not detected. A very good to almost perfect agreement was found for CT, NG and MG of  $\kappa=0.75$ ; 0.87 and 0.85, respectively. Using the Colli-Pee™ device only one low positive CT and two MG infections were missed, however, three additional CT, two NG and six MG infections were detected.

Conclusions: The Colli-Pee™ device is a feasible and convenient way to collect urine at home for STI testing. This may be particularly relevant for populations that need frequent STI testing, such as PrEP users, and patients who prefer home-sampling.

Trial registration: Clinicaltrials.gov database: NCT02552914

## ARTICLE SUMMARY

### Strengths and limitations of this study

- The study was designed as such to provide real-world experience concerning home-based sampling for STI detection including shipment by post among PrEP users.
- Home-based and clinic-based samples were processed and analyzed using the same procedures and laboratory staff was blinded for the results of the matching sample.
- A total of 49 samples was found to be positive for an STI on 471 samples, resulting in a high prevalence of STIs: 10.4%.
- Our main limitation is that home-based samples were not taken on the same day as clinic-based sampling and participants could have become positive during that window period.
- Views and perception concerning the usability and acceptability of the device during the study were captured but not yet analyzed.

### INTRODUCTION:

According to the World Health Organisation's Global Health Sector Strategy on Sexually Transmitted Infections (STIs) 2016-2021, early diagnosis and linkage to treatment are one of the key elements for preventing further transmission of STIs.[1] Currently, first-void urine is still favoured as the sample of choice for the detection of *Chlamydia trachomatis* (CT) and *Neisseria gonorrhoeae* (NG) in men, using nucleic acid amplification tests (NAATs).[2-4] In general, a regular urine container is used to collect the first-void urine sample, but the collected volume of urine is not standardized. Furthermore, this type of container is less convenient for postal delivery to the laboratory. Another sponged-based device (UriSWAB, Copan Diagnostics, Brescia, Italy) has been suggested as an alternative for postal delivery of urine. However, this device only holds 2 mL of urine and does not guarantee that only first-void urine is collected.[4,5] The CE-IVD labelled Colli-Pee™ device

1  
2  
3 (Novosanis, Belgium), provides a clean and standardized solution to the above-mentioned issues as  
4  
5 it efficiently captures first-void urine (20 mL) without interruption of the urine flow and allows the  
6  
7 samples to be sent by post. (Fig 1) The Colli-Pee™ device is currently used for the detection of  
8  
9 Human Papilloma Virus (HPV) and several urological cancers for which collection of first-void urine is  
10  
11 essential .[6,7] In the field of STIs, a standardized first-void urine study reported that the organism  
12  
13 load of *C. trachomatis* is maximal in the first 4-5 mL and that the performance of diagnostic tests  
14  
15 improved when using only first-void urine.[8,9]  
16  
17  
18  
19  
20  
21

22 Although pre-exposure prophylaxis (PrEP) is becoming crucial in HIV prevention, recent reviews of  
23  
24 real-world PrEP demonstration studies showed that PrEP is associated with increased diagnoses of  
25  
26 STIs in Men who have Sex with Men (MSM).[10,11] Consequently, current guidelines recommend a  
27  
28 bi-annual screening of STIs in PrEP users because of their high risk behaviour.[12,13]  
29  
30  
31

32 In order to facilitate the patient flow during follow-up visits by PrEP users, and prompt treatment of  
33  
34 STIs, home-based collection of first-void urine could be sent to the laboratory by regular mail for STI  
35  
36 detection before the scheduled visit. STI results may then be available at the time of the physician  
37  
38 consultation and in the case of a detected STI also immediately treated, limiting the risk of further  
39  
40 transmission.  
41  
42  
43

44 The objectives of this study were to compare the results of the molecular detection of several STIs  
45  
46 using the Colli-Pee™ device versus a sample obtained in the clinic, the use and acceptability of the  
47  
48 Colli-Pee™ device and its convenience for shipment by regular mail. To assess these objectives, a  
49  
50 nested sub-study was performed among MSM who participated in a Belgian PrEP demonstration  
51  
52 cohort. [14]  
53  
54  
55

## 56 **METHODS:**

57  
58  
59  
60

1  
2  
3 The evaluation was undertaken as a sub-study of Be-PrEP-ared, a PrEP demonstration study among  
4  
5 MSM at high risk for HIV in Belgium.  
6  
7

## 8 **The main study**

9

10 The Be-PrEP-ared project (EudraCTn<sup>o</sup>: 5015-00005437) was a phase 3, single-site, open-label  
11  
12 prospective cohort study where 200 MSM at high risk of acquiring HIV were asked to participate in  
13  
14 the project and to take PrEP daily or event-driven. Detailed study methods are described  
15  
16 elsewhere.[14] Participants were tested for *Neisseria gonorrhoeae* (NG), *Chlamydia trachomatis*  
17  
18 (CT), *Mycoplasma genitalium* (MG) and *Trichomonas vaginalis* (TV) at baseline and every three  
19  
20 months. Detection of these STIs was performed at the three biological sites: urethra, anorectum and  
21  
22 pharynx. During each study visit, participants collected urine in two urine containers at the clinic as  
23  
24 per the following instructions: urinate in the first container up to the marked line at approximately  
25  
26 20 mL, afterwards complete the second cup with no restrictions. Urine in the first container  
27  
28 (hereafter the clinic-based sample) was stored refrigerated until analysis that took place within a  
29  
30 maximum of 48h. Urine in the second container was used to detect proteinuria.  
31  
32  
33  
34  
35

36 The main study was approved by the Institutional Review Board of the Institute of Tropical Medicine  
37  
38 and the Ethics Committee of the Antwerp University Hospital. All participants signed an informed  
39  
40 consent form.  
41  
42  
43  
44  
45  
46

## 47 **Laboratory procedures**

48

49 In the first instance, CT/NG detection was performed using the Abbott Real Time (RT) CT/NG assay  
50  
51 (DNA extraction and sample preparation using Abbott m2000sp and the Abbott m2000rt system for  
52  
53 amplification and detection of CT/NG (Abbott Molecular Inc. Des Plaines, Illinois, USA)) according to  
54  
55 manufacturer's instructions. The remainder of the urine and DNA extracts were stored at -80 °C. In  
56  
57 the case of positivity, the same DNA extracts were tested by in-house real time-PCR (RT-PCR) assays  
58  
59  
60

1  
2  
3 for CT and/or NG, both based on previously published primer sets.[15,16]. A sample was considered  
4  
5 positive when positive in both the Abbott and the in-house RT-PCR. An initial positive Abbott assay  
6  
7 result followed by a negative confirmatory NAAT result was defined as 'not confirmed'. Inhibition of  
8  
9 the NAAT according to the Abbott assay was defined as 'inhibition'.  
10  
11

12  
13 The same DNA extracts were used for further testing. MG was detected and reported using an  
14  
15 accredited in-house RT-PCR that targets the pdhD-gene [17] and in addition the DiaMGTV multiplex  
16  
17 kit that detects MG and TV simultaneously was used for TV detection. No further confirmation of TV  
18  
19 took place.  
20  
21

### 22 **The Colli-Pee™ sub-study**

23  
24  
25 At the baseline visit of the Be-PrEP-ared study, participants were asked consent to participate in this  
26  
27 sub-study. After signing the informed consent form, they received a Colli-Pee™ device and a prepaid  
28  
29 envelope. They were instructed to collect first-void urine the next day at home using the Colli-Pee™  
30  
31 device (the home-based sample), to document the date and time of collection and to send the  
32  
33 collector tube filled with urine back to the laboratory by regular post, using the prepaid envelope.  
34  
35 Upon receipt in the laboratory, the urine was stored refrigerated (2-8°C) and CT, NG, MG, TV was  
36  
37 detected using the same NAATs within 48 hours. The urine and DNA extracts' remnants were stored  
38  
39 at -80°C. The quantity of human cells was measured at baseline using a human Endogenous  
40  
41 Retrovirus-3 (ERV-3) quantitative PCR on the paired clinic- and home-based samples.[18]  
42  
43  
44

45  
46 The lab technicians were blinded for the results obtained for the clinic-based sample. In addition, the  
47  
48 result of the home-based sample was not disclosed to the physician or participant.  
49  
50

51  
52 During the next visit, which took place within 14 days after baseline, participants were asked to  
53  
54 complete a small survey (five questions only) on the usability and willingness to use the Colli-Pee™  
55  
56 device (acceptability). Two questions documenting their opinion (likes-dislikes) of the Colli-Pee™  
57  
58 device were open-ended.  
59  
60



1  
2  
3 At follow-up month 6 and month 18 of the study, Colli-Pee™ devices were again distributed to those  
4 who agreed to participate and the survey was repeated at month 18 (results unreported).  
5  
6  
7

8 The sub-study was approved by the Institutional Review Board of the Institute of Tropical Medicine  
9 (Ref:1027/15) and has been registered in the clinicaltrials.gov database (NCT02552914).  
10  
11  
12

### 13 **Patient and Public Involvement**

14  
15  
16 Patients were not involved in the colli-pee™ substudy. Patients were not invited to comment on the  
17 study design and were not consulted to develop patient relevant outcomes or interpret the results.  
18  
19

20 Patients were not invited to contribute to the writing or editing of this document for readability or  
21 accuracy.  
22  
23  
24  
25

### 26 **Statistical analysis**

27  
28 The agreement of the results of the molecular assays using each of the two sampling methods was  
29 assessed by the use of Cohen's kappa statistic. Samples that were not confirmed were coded as  
30 negative samples for the calculation of the agreement. The agreement of concentration of human  
31 DNA in both sampling methods was assessed by using a t-test. A p-value of <0.05 was considered  
32 statistically significant. Both analyses were performed using STATA version 15.0 (StataCorp LP,  
33 College Station, TX, USA).  
34  
35  
36  
37  
38  
39  
40  
41

42 A descriptive analysis was made of the results of the self-administered questionnaire on the usability  
43 of the Colli-Pee™ device.  
44  
45  
46  
47

## 48 **RESULTS**

### 49 **Demographics**

50  
51  
52 The main study took place at the Institute of Tropical Medicine, Antwerp, Belgium from Sep 2015  
53 until May 2018. Of the 219 participants who were screened for eligibility into the main study, six  
54 participants did not consent to the Colli-Pee™ sub-study. All participants who consented to the sub-  
55  
56  
57  
58  
59  
60

study were MSM and three identified themselves as transwomen.[19] The mean age of the participants was 38.5 years (Interquartile Range 32-44). A total of 473 home-based samples from 213 participants were received. Two home-based samples could not be linked to the corresponding clinic-based sample and were therefore excluded, bringing the total number to 471. As shown in Table 1, the number of home-based samples received at the laboratory declined over time.

| Kind Of Visit | Clinic based | Home Based (% home-based samples received) |
|---------------|--------------|--------------------------------------------|
| Screening     | 218          | 187 (85.8%)                                |
| Month 6       | 191          | 152 (79.6%)                                |
| Month 18      | 179          | 132 (73.7%)                                |

Table 1: Number of clinic and home-based samples received during the study

Although the participants were instructed to report the urine collection date and hour on the collection device, only 72.8% (343/471) were labelled with collection date. Most of the home-based samples (79.6%) were taken within two days after the clinic-based sample and 3.8% were taken after 20 days (13/343) (median one day; min-max: 0-70 days). The median time between the collection of the home-based sample and its reception at the laboratory after postal return was five days (min-max: 0-27 days) and 69.6% arrived at the laboratory within those five days.

### Comparison of weight and concentration of human material between both sampling methods.

A total of 455 home-based and 423 clinic-based samples were weighed. The mean net weight of the home-based sample was  $19.68\text{g} \pm 2.14\text{g}$  (95%CI: 19.5g-19.9g and min-max: 6.81g-39.47g) vs  $22.87\text{g} \pm 13.64\text{g}$  (95%CI: 21.6g-24.2g and min-max: 2.88g - 86.23g) for the clinic-based sample.

The quantity of human cells was analysed at baseline only (n=187). In a total of five home-based and one clinic-based sample ERV could not be detected and these samples were considered as lacking human material. After removal of the paired samples lacking ERV or containing inhibitors, 182 observations could be paired. The mean quantity of the clinic-based sample was  $11.3 \times 10^3$  cells/PCR (95%CI: 7.4 -  $15.2 \times 10^3$ ) and for the home-based sample  $14.2 \times 10^3$  cells/PCR (95% CI: 6.8- $21.5 \times 10^3$ ) (p>0.05).

### STI results and agreement

Of the 471 home-based samples with a matching visit, six home-based and one clinic-based sample gave inhibition and were excluded from the analysis (n=464). The results are shown in Table 2.

| STI                                    | Home-based urine result | Clinic-based urine results |          |       |
|----------------------------------------|-------------------------|----------------------------|----------|-------|
|                                        |                         | Negative                   | Positive | Total |
| <i>Chlamydia trachomatis</i> (non-LGV) | Negative                | 454*                       | 1        | 455   |
|                                        | Positive                | 3                          | 6        | 9     |
|                                        | Total                   | 457                        | 7        | 464   |
| <i>Neisseria gonorrhoeae</i>           | Negative                | 455                        | 0        | 455   |
|                                        | Positive                | 2                          | 7        | 9     |
|                                        | Total                   | 457                        | 7        | 464   |
| <i>Mycoplasma genitalium</i>           | Negative                | 431                        | 2        | 433   |
|                                        | Positive                | 6                          | 25       | 31    |
|                                        | Total                   | 437                        | 27       | 464   |
| <i>Trichomonas vaginalis</i>           | Negative                | 464                        | 0        | 464   |
|                                        | Positive                | 0                          | 0        | 0     |
|                                        | Total                   | 464                        | 0        | 464   |

Table 2: STI results of the home-based and clinic-based urine samples

\* Two result were not-confirmed in the clinic-based sample

*Trichomonas vaginalis* was not detected. Cohen's kappa-agreement for CT/NG/MG is 0.75; 0.87 and 0.85, respectively, which indicates substantial agreement for *Chlamydia trachomatis* and almost perfect agreement for the other two STIs.

Tables 3 and 4 show the discordant results. For some of the home-based samples the date of collection was unknown so the time between the clinic visit and time of reception at the laboratory is depicted here. A delta-cycle (DC) value of the Abbott assay of less than two indicates a low positive infection.

| STI | DC value<br>CT/NG<br>Abbott assay | Ct value in-<br>house RT-PCR<br>for CT or NG* | Ct-value S-<br>DiagMGTV RT-PCR | Days between<br>collection | Days of<br>transport |
|-----|-----------------------------------|-----------------------------------------------|--------------------------------|----------------------------|----------------------|
| CT  | 1.49                              | 33.19                                         | NA                             | 0                          | 2                    |
| MG  | NA                                | 32.20                                         | Neg                            | 3                          | 4                    |
| MG  | NA                                | 32.04                                         | 37.44                          | 0                          | 8                    |

Table 3: STI infections that were not detected in home-based urine samples

\*: a different in-house RT-PCR assay was used for CT and NG

DC = delta cycle; Ct = Cycle threshold; NA = not applicable; Max = days between clinic visit and reception of the home-based sample at the laboratory

| STI | DC value<br>CT/NG<br>Abbott assay | Ct value in-<br>house RT-PCR<br>for CT or NG* | Ct-value S-<br>DiagMGTV RT-PCR | Days between<br>collection | Days of<br>transport |
|-----|-----------------------------------|-----------------------------------------------|--------------------------------|----------------------------|----------------------|
| CT  | 3.99                              | 34.26                                         | NA                             | 1                          | 2                    |
| CT  | 2.68                              | 35.31                                         | NA                             | 1                          | 6                    |
| CT  | 0.27                              | 36.06                                         | NA                             | 6                          | 4                    |

| STI | DC value<br>CT/NG<br>Abbott assay | Ct value in-<br>house RT-PCR<br>for CT or NG* | Ct-value S-<br>DiagMGTV RT-PCR | Days between<br>collection | Days of<br>transport |
|-----|-----------------------------------|-----------------------------------------------|--------------------------------|----------------------------|----------------------|
| NG  | 2.93                              | 37.58                                         | NA                             | 8                          | 4                    |
| NG  | 10.08                             | 25.26                                         | NA                             | 2                          | 6                    |
| MG  | NA                                | 31.28                                         | Neg                            | Max 6                      | Max 6                |
| MG  | NA                                | 31.96                                         | 40.51                          | 1                          | 2                    |
| MG  | NA                                | 28.66                                         | 34.67                          | Max 3                      | Max 3                |
| MG  | NA                                | 34.58                                         | 38.50                          | 9                          | 4                    |
| MG  | NA                                | 34.23                                         | Neg                            | 1                          | 5                    |
| MG  | NA                                | 32.04                                         | 38.14                          | Max 3                      | Max 3                |

Table 4: STI infections that were additionally detected in home-based urine samples

\*: a different in-house RT-PCR assay was used for CT and NG

DC = delta cycle; Ct = Cycle threshold; NA = not applicable; Max = days between clinic visit and reception of the home-based sample at the laboratory

### Acceptability and usability of the Colli-Pee™ device

A total of 164 participants provided feedback regarding the use of the Colli-Pee™ device at baseline. On a scale of one to five, 87.8% found that the Colli-Pee™ device was easy to very easy to use. Instructions on how to send the Colli-Pee™ device were found to be easy by 90.2% of the participants. Four participants found the Colli-Pee™ difficult to use (2.4%) and four other participants found it difficult to follow the instructions (2.4%). Likes from participants were: the ease of use (54.9%), no interruption of the urine flow (15.9%), hygienic (11.6%) and privacy of the home-based sample collection (11.0%); the dislikes were: nothing (47.0%), not being recyclable (14.6%), not hygienic (10.4%) and being too large (6.1%).

To the question of whether they would order an online STI test, 89.0% answered positively (146/164) and 91.1% (133/146) of those individuals would use the Colli-Pee™ device in that case. Six

1  
2  
3 participants (4.1%) would not want to use the Colli-Pee™ device when ordering an online STI test.  
4  
5 Participants were also asked how much they would pay for an online STI test with self-sampling.  
6  
7 Price indications ranged from 0€ (10 participants) to 60€. Most of the participants (89/164) were  
8  
9 willing to pay 10-20€.  
10  
11  
12  
13  
14  
15

## 16 DISCUSSION

17  
18  
19 Many studies have reported on male self-collected urine versus urethra clinician-collected sampling  
20  
21 for STI screening , but ‘real-world’ studies, including sending of home-based urine samples for STI  
22  
23 detection in men by post, are sparse.[4,5,20,21] In this study, we showed that the Colli-Pee™  
24  
25 collection device is a valuable and reliable method for collecting first-void urine for STI detection in  
26  
27 MSM in Belgium, and that the collector can be shipped by regular post. Compared to the clinic-based  
28  
29 sample, a total of three STIs (one CT and two MG infections) were not detected in the home-based  
30  
31 sample. However, 11 additional infections were found in home-based samples collected with the  
32  
33 Colli-Pee™ device (3 CT, 2 NG and 6 MG infections). This high number of additional STIs could be  
34  
35 explained by the fact that first-void urine contains more DNA/RNA than mid-stream and, as a  
36  
37 consequence, should still be used for STI detection.[9] However, the fact that participants could  
38  
39 become positive during the time in between sampling points is one of our main limitations and  
40  
41 cannot be ignored. Nevertheless, the most important observation is that only one Chlamydia  
42  
43 positive result was missed. The DC value of the Abbott assay performed on that clinic-based sample  
44  
45 highlighted the low bacterial load of that infection; in addition, transportation at room temperature  
46  
47 for two days could have induced DNA degradation.  
48  
49  
50  
51  
52

53 The World Health Organisation (WHO) underlines the importance of integrating point-of-care assays  
54  
55 (POCTs) including innovative delivery options such as self-testing. [22] Unfortunately, to our  
56  
57 knowledge, current commercial POCTs for the most important STIs such as *Chlamydia trachomatis*  
58  
59  
60

1  
2  
3 and *Neisseria gonorrhoeae* are still of sub-optimal quality and do not meet the ASSURED criteria that  
4 were developed by the WHO STI Diagnostics Initiative.[22–25] A solution to the unavailability of  
5 qualitative POCTs could be internet-accessed STI testing (e-STI testing) which is increasingly available  
6 as an alternative to clinic testing all over the world.[26] E-STI testing includes postal self-sampling  
7 test kits that are sent to a certified laboratory and web-based delivery of test results. Swab2Know,  
8 an online HIV testing project confirmed that e-HIV testing is acceptable and feasible among MSM in  
9 Belgium. [27] Commercial online self-sampling services for STIs are now emerging over the internet,  
10 but evaluation of these services is lacking.

11  
12 The present study is, however, subject to several limitations. Firstly, we could only enrol Be-PrEP-  
13 ared participants and the participation level seriously declined during the study. As a result, our  
14 number of CT/NG positives is quite low, which precludes firm conclusions. Secondly, as mentioned  
15 above, home-based samples were not taken on the same day as clinic-based sampling and  
16 participants could have become positive during that window period. We also do not know whether  
17 participants had urinated one hour prior to collection. However, recent data show that the time  
18 between micturitions is not crucial for the detection of Chlamydia in men.[28] Finally, reporting bias  
19 is also not to be excluded. Not all participants who used a Colli-Pee™ device completed the survey,  
20 the additional questions were included at the end of the lengthy main questionnaire of the Be-PrEP-  
21 ared study.

22  
23 Besides PrEP users, e-STI testing has the potential to reach those who are most in need and a recent  
24 study showed that some higher-risk groups, such as MSM, were more likely to use online services  
25 [26,29]. Many studies have shown that home-based sampling is well accepted and, in fact, is the  
26 preferred approach in these groups for STIs. Reasons for choosing home-based sampling were  
27 shorter waiting times for results, convenience and less embarrassment. [30] Participants views  
28 regarding ordering an online STI test in this study were very positive, 89% would like to order such a  
29 kit. The Colli-Pee™ device was also found to be easy (90.2%) and although hygiene was one of the  
30  
31  
32  
33  
34  
35  
36  
37  
38  
39  
40  
41  
42  
43  
44  
45  
46  
47  
48  
49  
50  
51  
52  
53  
54  
55  
56  
57  
58  
59  
60

1  
2  
3 likes, it also appeared in the dislikes, probably because the need to detach the collector manually  
4  
5 can cause leakage of urine. Participants were also concerned regarding possible ecological  
6  
7 consequences, although the plastic material is recyclable and can be incinerated into energy.  
8  
9

10 We demonstrated that postal delivery of home-based collected urine does not influence STI  
11  
12 detection and can be used among PrEP users. Subsequently, PrEP users will be able to send first-void  
13  
14 urine to the laboratory with the Colli-Pee™ device one to two weeks before their routine PrEP follow  
15  
16 up visit. Results can then be discussed during the physician consultation and followed by treatment  
17  
18 and future antimicrobial testing if applicable, decreasing the number of physician visits. Decreasing  
19  
20 the number of face-to-face visits will lower the burden on staff workload and healthcare resources.  
21  
22 However, future economic evaluations will need to be conducted to prove this statement. E-STI  
23  
24 testing could be a promising approach in Belgium to reach patients in hard-to-reach populations and  
25  
26 research on this topic should be stimulated. Therefore, future studies to study the acceptability and  
27  
28 impact of postal shipment of home-collected material on the performance of STI assays requires  
29  
30 additional assessment.  
31  
32  
33  
34  
35  
36  
37  
38

39 Figure legend: Fig 1: The Colli-Pee™ device instructions for use.  
40  
41

## 42 **ACKNOWLEDGEMENTS**

43  
44  
45 We would like to thank all the participants of the Be-PrEP-ared study who participated in this small  
46  
47 study. We also would like to thank Be-PrEP-ared study group but especially Maureen Aerts who was  
48  
49 crucial in the participation level of this study.  
50  
51

## 52 **COMPETING INTERESTS STATEMENT**

53  
54  
55 The authors have no competing interests to declare.  
56  
57  
58  
59  
60



## FUNDING STATEMENT

This work was supported by Novosanis who provided the Colli-Pee™ devices and partially paid for the analyses performed on the home-based samples. In addition, a grant was obtained from the Flemish Agency for Innovation and Entrepreneurship to conduct the Be-PrEP-ared study.

## DATASHARING STATEMENT

The data will be made publicly available except for the use and acceptability data as these will be retained at the Institute of Tropical Medicine (ITM), Antwerp due to ethical and privacy concerns. According to the ITM research data sharing policy, only fully anonymised data can be shared publicly. The data can however be made available after approval of a motivated and written request to the ITM at ITMresearchdataaccess@itg.be. The ITM data access committee will verify if the dataset is suitable for obtaining the study objective and assure that confidentiality and ethical requirements are in place.

## CONTRIBUTORSHIP STATEMENT

IDB, TC, and BV designed the study. TR designed the acceptability survey. IDB performed the statistical analysis and wrote the first draft of the manuscript. HS, BDD, VC, SA performed testing. All authors read the final version of the manuscript and provided comments.

## REFERENCES

- 1 WHO. Global Health Sector Strategy on Sexually Transmitted Infections 2016-2021. *World Heal Organ* 2016;**1**:63. doi:10.1055/s-2007-970201.
- 2 Lanjouw E, Ouburg S, de Vries H, *et al.* 2015 European guideline on the management of *Chlamydia trachomatis* infections. *Int J STD AIDS* 2016;**27**:333–48. doi:10.1177/0956462415618837

- 1  
2  
3 3 Bignell C, Unemo M, Radcliffe K, *et al.* 2012 European guideline on the diagnosis and  
4 treatment of gonorrhoea in adults. *Int J STD AIDS* 2013;**24**:85–92.  
5  
6 doi:10.1177/0956462412472837  
7  
8  
9  
10 4 Lunny C, Taylor D, Hoang L, *et al.* Self-Collected versus Clinician-Collected Sampling for  
11 Chlamydia and Gonorrhoea Screening: A Systemic Review and Meta-Analysis. *PLoS One*  
12 2015;**10**:e0132776. doi:10.1371/journal.pone.0132776  
13  
14  
15  
16  
17 5 McNicol J, Debattista J. Use of the UriSwab collection device for testing of *Chlamydia*  
18 *trachomatis* and *Neisseria gonorrhoeae* : implications for a postal testing service. *Int J STD*  
19 *AIDS* 2013;**24**:477–80. doi:10.1177/0956462412472834  
20  
21  
22  
23  
24  
25 6 Vorsters A, Van den Bergh J, Micalessi I, *et al.* Optimization of HPV DNA detection in urine by  
26 improving collection, storage, and extraction. *Eur J Clin Microbiol Infect Dis* 2014;**33**:2005–14.  
27  
28 doi:10.1007/s10096-014-2147-2  
29  
30  
31  
32 7 Theodorescu D, Schiffer E, Bauer HW, *et al.* Discovery and validation of urinary biomarkers for  
33 prostate cancer. *Proteomics Clin Appl* 2008;**2**:556–70. doi:10.1002/prca.200780082  
34  
35  
36  
37 8 Wisniewski CA, White JA, Michel C-EC, *et al.* Optimal method of collection of first-void urine  
38 for diagnosis of *Chlamydia trachomatis* infection in men. *J Clin Microbiol* 2008;**46**:1466–9.  
39  
40  
41  
42  
43  
44  
45 9 Johnson DJ, Calderaro AC, Roberts KA. Variation in Nuclear DNA Concentrations During  
46 Urination. *J Forensic Sci* 2007;**52**:110–3. doi:10.1111/j.1556-4029.2006.00329.x  
47  
48  
49  
50 10 Traeger MW, Schroeder SE, Wright EJ, *et al.* Effects of Pre-exposure Prophylaxis for the  
51 Prevention of Human Immunodeficiency Virus Infection on Sexual Risk Behavior in Men Who  
52 Have Sex With Men: A Systematic Review and Meta-analysis. *Clin Infect Dis* Published Online  
53  
54  
55  
56  
57  
58  
59  
60 11 Kojima N, Davey DJ, Klausner JD. Pre-exposure prophylaxis for human immunodeficiency

- 1  
2  
3 virus and sexually transmitted infection acquisition among men who have sex with men. *AIDS*  
4  
5 Published Online First: 2016. doi:10.1097/QAD.0000000000001185  
6  
7  
8  
9 12 Salazar NAMEJ. EACS HIV guidelines 8.1. 2016.  
10  
11 13 WHO implementation tool for pre-exposure prophylaxis (PrEP) of HIV infection. *Geneva*  
12  
13 *World Heal Organ* Published Online First: 2017.[http://www.who.int/hiv/pub/prep/prep-](http://www.who.int/hiv/pub/prep/prep-implementation-tool/en/)  
14  
15 [implementation-tool/en/](http://www.who.int/hiv/pub/prep/prep-implementation-tool/en/) (accessed 21 Aug 2018).  
16  
17  
18  
19 14 De Baetselier I, Reyniers T, Nöstlinger C, *et al.* Pre-Exposure Prophylaxis (PrEP) as an  
20  
21 Additional Tool for HIV Prevention Among Men Who Have Sex With Men in Belgium: The Be-  
22  
23 PrEP-ared Study Protocol. *JMIR Res Protoc* 2017;**6**:e11. doi:10.2196/resprot.6767  
24  
25  
26 15 Chen C-Y, Chi KH, Alexander S, *et al.* A real-time quadriplex PCR assay for the diagnosis of  
27  
28 rectal lymphogranuloma venereum and non-lymphogranuloma venereum Chlamydia  
29  
30 trachomatis infections. *Sex Transm Infect* 2008;**84**:273–6. doi:10.1136/sti.2007.029058  
31  
32  
33 16 Hopkins MJ, Ashton LJ, Alloba F, *et al.* Validation of a laboratory-developed real-time PCR  
34  
35 protocol for detection of Chlamydia trachomatis and Neisseria gonorrhoeae in urine. *Sex*  
36  
37 *Transm Infect* 2010;**86**:207–11. doi:10.1136/sti.2009.040634  
38  
39  
40 17 Müller EE, Venter JME, Magooa MP, *et al.* Development of a rotor-gene real-time PCR assay  
41  
42 for the detection and quantification of Mycoplasma genitalium. *J Microbiol Methods*  
43  
44 2012;**88**:311–5. doi:10.1016/j.mimet.2011.12.017  
45  
46  
47  
48 18 Yuan CC, Miley W, Waters D. A quantification of human cells using an ERV-3 real time PCR  
49  
50 assay. *J Virol Methods* 2001;**91**:109–17.  
51  
52  
53 19 Reyniers T, Nöstlinger C, Laga M, *et al.* Choosing between daily and event-driven Pre-  
54  
55 Exposure Prophylaxis: results of a Belgian PrEP demonstration project Conflict of Interest and  
56  
57 Source of Funding: A grant was obtained from the Flemish Agency for. *JAIDS J Acquir Immune*  
58  
59 *Defic Syndr Publ Ahead Print* doi:10.1097/QAI.0000000000001791  
60

- 1  
2  
3 20 Morré SA, van Valkengoed IG, de Jong A, *et al.* Mailed, home-obtained urine specimens: a  
4 reliable screening approach for detecting asymptomatic *Chlamydia trachomatis* infections. *J*  
5 *Clin Microbiol* 1999;**37**:976–80.<http://www.ncbi.nlm.nih.gov/pubmed/10074512> (accessed  
6 21 Aug 2018).  
7  
8  
9  
10  
11  
12 21 Fajardo-Bernal L, Aponte-Gonzalez J, Vigil P, *et al.* Home-based versus clinic-based specimen  
13 collection in the management of *Chlamydia trachomatis* and *Neisseria gonorrhoeae*  
14 infections. *Cochrane Database Syst Rev* 2015;:CD011317.  
15 doi:10.1002/14651858.CD011317.pub2  
16  
17  
18  
19  
20  
21  
22 22 Toskin I, Blondeel K, Peeling RW, *et al.* Advancing point of care diagnostics for the control and  
23 prevention of STIs: the way forward. *Sex Transm Infect* 2017;**93**:S81–8. doi:10.1136/sextrans-  
24 2016-053073  
25  
26  
27  
28  
29  
30 23 De Baetselier I, Mwambarangwe L, Cuylaerts V, *et al.* Evaluation of an enzymatic *Chlamydia*  
31 *trachomatis* point-of-care rapid assay in Rwanda: the BioChekSwab Rapid Test. *Sex Transm*  
32 *Infect* Published Online First: 16 October 2015. doi:10.1136/sextrans-2015-052202  
33  
34  
35  
36  
37 24 Peeling RW, Holmes KK, Mabey D, *et al.* Rapid tests for sexually transmitted infections (STIs):  
38 the way forward. *Sex Transm Infect* 2006;**82**:v1–6. doi:10.1136/sti.2006.024265  
39  
40  
41  
42 25 European Centre for Disease Prevention and Control. Novel approaches to testing for sexually  
43 transmitted infections, including HIV and hepatitis B and C in Europe. Stockholm: 2012.  
44 doi:10.2900/6481  
45  
46  
47  
48  
49 26 Wilson E, Free C, Morris TP, *et al.* Internet-accessed sexually transmitted infection (e-STI)  
50 testing and results service: A randomised, single-blind, controlled trial. *PLOS Med*  
51 2017;**14**:e1002479. doi:10.1371/journal.pmed.1002479  
52  
53  
54  
55  
56  
57 27 Platteau T, Fransen K, Apers L, *et al.* Swab2know: An HIV-Testing Strategy Using Oral Fluid  
58 Samples and Online Communication of Test Results for Men Who Have Sex With Men in  
59  
60

- 1  
2  
3 Belgium. *J Med Internet Res* 2015;**17**:e213. doi:10.2196/jmir.4384  
4  
5  
6 28 Mathew T, O'Mahony C, Mallinson H. Shortening the voiding interval for men having  
7  
8 chlamydia nucleic acid amplification tests. *Int J STD AIDS* 2009;**20**:752–3.  
9  
10 doi:10.1258/ijisa.2009.009225  
11  
12  
13 29 Barnard S, Free C, Bakolis I, *et al*. Comparing the characteristics of users of an online service  
14  
15 for STI self-sampling with clinic service users: a cross-sectional analysis. *Sex Transm Infect*  
16  
17 2018;;sextrans-2017-053302. doi:10.1136/sextrans-2017-053302  
18  
19  
20  
21 30 Paudyal P, Llewellyn C, Lau J, *et al*. Obtaining self-samples to diagnose curable sexually  
22  
23 transmitted infections: a systematic review of patients' experiences. *PLoS One*  
24  
25 2015;**10**:e0124310. doi:10.1371/journal.pone.0124310  
26  
27  
28  
29  
30  
31  
32  
33  
34  
35  
36  
37  
38  
39  
40  
41  
42  
43  
44  
45  
46  
47  
48  
49  
50  
51  
52  
53  
54  
55  
56  
57  
58  
59  
60

1  
2  
3  
4  
5  
6  
7  
8  
9  
10  
11  
12  
13  
14  
15  
16  
17  
18  
19  
20  
21  
22  
23  
24  
25  
26  
27  
28  
29  
30  
31  
32  
33  
34  
35  
36  
37  
38  
39  
40  
41  
42  
43  
44  
45  
46  
47  
48  
49  
50  
51  
52  
53  
54  
55  
56  
57  
58  
59  
60

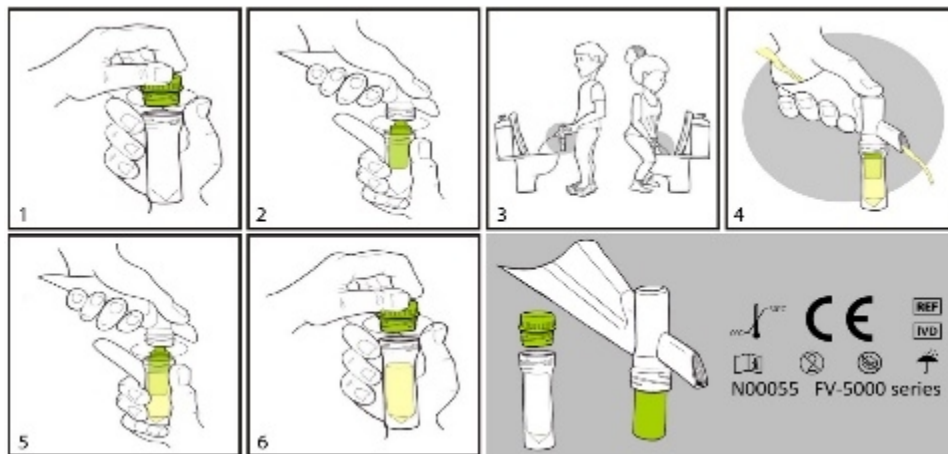

55x26mm (220 x 220 DPI)

| Section & Topic          | No         | Item                                                                                                                                                   | Reported on page #                                                                           |
|--------------------------|------------|--------------------------------------------------------------------------------------------------------------------------------------------------------|----------------------------------------------------------------------------------------------|
| <b>TITLE OR ABSTRACT</b> |            |                                                                                                                                                        |                                                                                              |
|                          | <b>1</b>   | Identification as a study of diagnostic accuracy using at least one measure of accuracy (such as sensitivity, specificity, predictive values, or AUC)  | 2 (agreement was used as this is not a diagnostic study)                                     |
| <b>ABSTRACT</b>          |            |                                                                                                                                                        |                                                                                              |
|                          | <b>2</b>   | Structured summary of study design, methods, results, and conclusions (for specific guidance, see STARD for Abstracts)                                 | 2                                                                                            |
| <b>INTRODUCTION</b>      |            |                                                                                                                                                        |                                                                                              |
|                          | <b>3</b>   | Scientific and clinical background, including the intended use and clinical role of the index test                                                     | 3-4                                                                                          |
|                          | <b>4</b>   | Study objectives and hypotheses                                                                                                                        | 4                                                                                            |
| <b>METHODS</b>           |            |                                                                                                                                                        |                                                                                              |
| <i>Study design</i>      | <b>5</b>   | Whether data collection was planned before the index test and reference standard were performed (prospective study) or after (retrospective study)     | 5                                                                                            |
| <i>Participants</i>      | <b>6</b>   | Eligibility criteria                                                                                                                                   | 5                                                                                            |
|                          | <b>7</b>   | On what basis potentially eligible participants were identified (such as symptoms, results from previous tests, inclusion in registry)                 | 5-6                                                                                          |
|                          | <b>8</b>   | Where and when potentially eligible participants were identified (setting, location and dates)                                                         | 5                                                                                            |
|                          | <b>9</b>   | Whether participants formed a consecutive, random or convenience series                                                                                | 5-6                                                                                          |
| <i>Test methods</i>      | <b>10a</b> | Index test, in sufficient detail to allow replication                                                                                                  | Not applicable same assay was used on both samples (but different kind of sample)            |
|                          | <b>10b</b> | Reference standard, in sufficient detail to allow replication                                                                                          | Not applicable same assay was used on both samples (but different kind of sample)            |
|                          | <b>11</b>  | Rationale for choosing the reference standard (if alternatives exist)                                                                                  | Not applicable same assay was used on both samples (but different kind of sample)            |
|                          | <b>12a</b> | Definition of and rationale for test positivity cut-offs or result categories of the index test, distinguishing pre-specified from exploratory         | 5-6                                                                                          |
|                          | <b>12b</b> | Definition of and rationale for test positivity cut-offs or result categories of the reference standard, distinguishing pre-specified from exploratory | 5-6                                                                                          |
|                          | <b>13a</b> | Whether clinical information and reference standard results were available to the performers/readers of the index test                                 | 6                                                                                            |
|                          | <b>13b</b> | Whether clinical information and index test results were available to the assessors of the reference standard                                          | 6                                                                                            |
| <i>Analysis</i>          | <b>14</b>  | Methods for estimating or comparing measures of diagnostic accuracy                                                                                    | 7                                                                                            |
|                          | <b>15</b>  | How indeterminate index test or reference standard results were handled                                                                                | 6                                                                                            |
|                          | <b>16</b>  | How missing data on the index test and reference standard were handled                                                                                 | Not applicable                                                                               |
|                          | <b>17</b>  | Any analyses of variability in diagnostic accuracy, distinguishing pre-specified from exploratory                                                      | Not applicable                                                                               |
|                          | <b>18</b>  | Intended sample size and how it was determined                                                                                                         | Not applicable                                                                               |
| <b>RESULTS</b>           |            |                                                                                                                                                        |                                                                                              |
| <i>Participants</i>      | <b>19</b>  | Flow of participants, using a diagram                                                                                                                  | We did not include of flow of participants, however this has been discussed in the text p7-8 |

|    |                          |            |                                                                                                             |                                     |
|----|--------------------------|------------|-------------------------------------------------------------------------------------------------------------|-------------------------------------|
| 1  |                          | <b>20</b>  | Baseline demographic and clinical characteristics of participants                                           | 7-8                                 |
| 2  |                          | <b>21a</b> | Distribution of severity of disease in those with the target condition                                      | Not applicable                      |
| 3  |                          | <b>21b</b> | Distribution of alternative diagnoses in those without the target condition                                 | Not applicable                      |
| 4  |                          | <b>22</b>  | Time interval and any clinical interventions between index test and reference standard                      | 8                                   |
| 5  | <i>Test results</i>      | <b>23</b>  | Cross tabulation of the index test results (or their distribution) by the results of the reference standard | 8                                   |
| 6  |                          | <b>24</b>  | Estimates of diagnostic accuracy and their precision (such as 95% confidence intervals)                     | Cohen's kappa agreement was used p9 |
| 7  |                          | <b>25</b>  | Any adverse events from performing the index test or the reference standard                                 | Not applicable                      |
| 8  |                          |            |                                                                                                             |                                     |
| 9  |                          |            |                                                                                                             |                                     |
| 10 |                          | <b>25</b>  | Any adverse events from performing the index test or the reference standard                                 | Not applicable                      |
| 11 | <b>DISCUSSION</b>        |            |                                                                                                             |                                     |
| 12 |                          | <b>26</b>  | Study limitations, including sources of potential bias, statistical uncertainty, and generalisability       | 13                                  |
| 13 |                          | <b>27</b>  | Implications for practice, including the intended use and clinical role of the index test                   | 13-14                               |
| 14 |                          |            |                                                                                                             |                                     |
| 15 | <b>OTHER INFORMATION</b> |            |                                                                                                             |                                     |
| 16 |                          |            |                                                                                                             |                                     |
| 17 |                          | <b>28</b>  | Registration number and name of registry                                                                    | 6                                   |
| 18 |                          | <b>29</b>  | Where the full study protocol can be accessed                                                               | Will be added as appendix           |
| 19 |                          | <b>30</b>  | Sources of funding and other support; role of funders                                                       | 15                                  |
| 20 |                          |            |                                                                                                             |                                     |
| 21 |                          |            |                                                                                                             |                                     |
| 22 |                          |            |                                                                                                             |                                     |
| 23 |                          |            |                                                                                                             |                                     |
| 24 |                          |            |                                                                                                             |                                     |
| 25 |                          |            |                                                                                                             |                                     |
| 26 |                          |            |                                                                                                             |                                     |
| 27 |                          |            |                                                                                                             |                                     |
| 28 |                          |            |                                                                                                             |                                     |
| 29 |                          |            |                                                                                                             |                                     |
| 30 |                          |            |                                                                                                             |                                     |
| 31 |                          |            |                                                                                                             |                                     |
| 32 |                          |            |                                                                                                             |                                     |
| 33 |                          |            |                                                                                                             |                                     |
| 34 |                          |            |                                                                                                             |                                     |
| 35 |                          |            |                                                                                                             |                                     |
| 36 |                          |            |                                                                                                             |                                     |
| 37 |                          |            |                                                                                                             |                                     |
| 38 |                          |            |                                                                                                             |                                     |
| 39 |                          |            |                                                                                                             |                                     |
| 40 |                          |            |                                                                                                             |                                     |
| 41 |                          |            |                                                                                                             |                                     |
| 42 |                          |            |                                                                                                             |                                     |
| 43 |                          |            |                                                                                                             |                                     |
| 44 |                          |            |                                                                                                             |                                     |
| 45 |                          |            |                                                                                                             |                                     |
| 46 |                          |            |                                                                                                             |                                     |
| 47 |                          |            |                                                                                                             |                                     |
| 48 |                          |            |                                                                                                             |                                     |
| 49 |                          |            |                                                                                                             |                                     |
| 50 |                          |            |                                                                                                             |                                     |
| 51 |                          |            |                                                                                                             |                                     |
| 52 |                          |            |                                                                                                             |                                     |
| 53 |                          |            |                                                                                                             |                                     |
| 54 |                          |            |                                                                                                             |                                     |
| 55 |                          |            |                                                                                                             |                                     |
| 56 |                          |            |                                                                                                             |                                     |
| 57 |                          |            |                                                                                                             |                                     |
| 58 |                          |            |                                                                                                             |                                     |
| 59 |                          |            |                                                                                                             |                                     |
| 60 |                          |            |                                                                                                             |                                     |



# STARD 2015

---

## AIM

STARD stands for “Standards for Reporting Diagnostic accuracy studies”. This list of items was developed to contribute to the completeness and transparency of reporting of diagnostic accuracy studies. Authors can use the list to write informative study reports. Editors and peer-reviewers can use it to evaluate whether the information has been included in manuscripts submitted for publication.

---

## EXPLANATION

A **diagnostic accuracy study** evaluates the ability of one or more medical tests to correctly classify study participants as having a **target condition**. This can be a disease, a disease stage, response or benefit from therapy, or an event or condition in the future. A medical test can be an imaging procedure, a laboratory test, elements from history and physical examination, a combination of these, or any other method for collecting information about the current health status of a patient.

The test whose accuracy is evaluated is called **index test**. A study can evaluate the accuracy of one or more index tests. Evaluating the ability of a medical test to correctly classify patients is typically done by comparing the distribution of the index test results with those of the **reference standard**. The reference standard is the best available method for establishing the presence or absence of the target condition. An accuracy study can rely on one or more reference standards.

If test results are categorized as either positive or negative, the cross tabulation of the index test results against those of the reference standard can be used to estimate the **sensitivity** of the index test (the proportion of participants *with* the target condition who have a positive index test), and its **specificity** (the proportion *without* the target condition who have a negative index test). From this cross tabulation (sometimes referred to as the contingency or “2x2” table), several other accuracy statistics can be estimated, such as the positive and negative **predictive values** of the test. Confidence intervals around estimates of accuracy can then be calculated to quantify the statistical **precision** of the measurements.

If the index test results can take more than two values, categorization of test results as positive or negative requires a **test positivity cut-off**. When multiple such cut-offs can be defined, authors can report a receiver operating characteristic (ROC) curve which graphically represents the combination of sensitivity and specificity for each possible test positivity cut-off. The **area under the ROC curve** informs in a single numerical value about the overall diagnostic accuracy of the index test.

The **intended use** of a medical test can be diagnosis, screening, staging, monitoring, surveillance, prediction or prognosis. The **clinical role** of a test explains its position relative to existing tests in the clinical pathway. A replacement test, for example, replaces an existing test. A triage test is used before an existing test; an add-on test is used after an existing test.

Besides diagnostic accuracy, several other outcomes and statistics may be relevant in the evaluation of medical tests. Medical tests can also be used to classify patients for purposes other than diagnosis, such as staging or prognosis. The STARD list was not explicitly developed for these other outcomes, statistics, and study types, although most STARD items would still apply.

---

## DEVELOPMENT

This STARD list was released in 2015. The 30 items were identified by an international expert group of methodologists, researchers, and editors. The guiding principle in the development of STARD was to select items that, when reported, would help readers to judge the potential for bias in the study, to appraise the applicability of the study findings and the validity of conclusions and recommendations. The list represents an update of the first version, which was published in 2003.

More information can be found on <http://www.equator-network.org/reporting-guidelines/stard>.

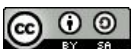

# BMJ Open

## EVALUATION OF THE "COLLI-PEE™", A FIRST-VOID URINE COLLECTION DEVICE FOR SELF-SAMPLING AT HOME FOR THE DETECTION OF SEXUALLY TRANSMITTED INFECTIONS, VERSUS A ROUTINE CLINIC BASED URINE COLLECTION IN A ONE-TO-ONE COMPARISON STUDY DESIGN: EFFICACY AND ACCEPTABILITY AMONG MSM IN BELGIUM

|                                 |                                                                                                                                                                                                                                                                                                                                                                                                                                                                                                                                                                                                                                                                             |
|---------------------------------|-----------------------------------------------------------------------------------------------------------------------------------------------------------------------------------------------------------------------------------------------------------------------------------------------------------------------------------------------------------------------------------------------------------------------------------------------------------------------------------------------------------------------------------------------------------------------------------------------------------------------------------------------------------------------------|
| Journal:                        | <i>BMJ Open</i>                                                                                                                                                                                                                                                                                                                                                                                                                                                                                                                                                                                                                                                             |
| Manuscript ID                   | bmjopen-2018-028145.R1                                                                                                                                                                                                                                                                                                                                                                                                                                                                                                                                                                                                                                                      |
| Article Type:                   | Research                                                                                                                                                                                                                                                                                                                                                                                                                                                                                                                                                                                                                                                                    |
| Date Submitted by the Author:   | 12-Feb-2019                                                                                                                                                                                                                                                                                                                                                                                                                                                                                                                                                                                                                                                                 |
| Complete List of Authors:       | De Baetselier, Irith; Institute of Tropical Medicine, Department of Clinical Sciences<br>Smet, Hilde; Institute of Tropical Medicine, Department of Clinical Sciences<br>Abdellati, Said; Institute of Tropical Medicine, Department of Clinical Sciences<br>De Deken, Bénédicte; Institute of Tropical Medicine, Department of Clinical Sciences<br>Cuylaerts, Vicky; Institute of Tropical Medicine, Department of Clinical Sciences<br>Reyniers, Thijs; Institute of Tropical Medicine, Department of Public Health<br>Vuylsteke, Bea; Institute of Tropical Medicine, Public Health<br>Crucitti, Tania; Institute of Tropical Medicine, Department of Clinical Sciences |
| <b>Primary Subject Heading</b>: | Sexual health                                                                                                                                                                                                                                                                                                                                                                                                                                                                                                                                                                                                                                                               |
| Secondary Subject Heading:      | Diagnostics                                                                                                                                                                                                                                                                                                                                                                                                                                                                                                                                                                                                                                                                 |
| Keywords:                       | neisseria gonorrhoeae, chlamydia trachomatis, screening, urine, pre-exposure prophylaxis, MSM                                                                                                                                                                                                                                                                                                                                                                                                                                                                                                                                                                               |
|                                 |                                                                                                                                                                                                                                                                                                                                                                                                                                                                                                                                                                                                                                                                             |

SCHOLARONE™  
Manuscripts

1  
2  
3  
4  
5 **EVALUATION OF THE “COLLI-PEE™”, A FIRST-VOID URINE**  
6  
7  
8  
9  
10 **COLLECTION DEVICE FOR SELF-SAMPLING AT HOME**  
11  
12  
13  
14 **FOR THE DETECTION OF SEXUALLY TRANSMITTED**  
15  
16  
17  
18 **INFECTIONS, VERSUS A ROUTINE CLINIC BASED URINE**  
19  
20  
21  
22  
23 **COLLECTION IN A ONE-TO-ONE COMPARISON STUDY**  
24  
25  
26  
27  
28 **DESIGN: EFFICACY AND ACCEPTABILITY AMONG MSM IN**  
29  
30  
31  
32 **BELGIUM**

33  
34  
35  
36  
37  
38  
39 Authors: De Baetselier Irith<sup>1</sup>, Smet Hilde<sup>1</sup>, Abdellati Saïd<sup>1</sup>, De Deken Bénédicte<sup>1</sup>, Cuylaerts Vicky<sup>1</sup>,  
40  
41 Reyniers Thijs<sup>2</sup>, Vuylsteke Bea<sup>2</sup>, Crucitti Tania<sup>1</sup>

42  
43  
44  
45 <sup>1</sup>Institute of Tropical Medicine, Department of Clinical Sciences, HIV/STI Reference Laboratory,  
46  
47 Antwerp, Belgium

48  
49  
50 <sup>2</sup>Institute of Tropical Medicine, Department of Public Health, HIV Sexual Unit, Antwerp, Belgium

51  
52  
53 Corresponding Author Details:

54  
55  
56 Irith De Baetselier MSc.

57  
58  
59 Institute of Tropical Medicine

60  
Nationalestraat 155

1  
2  
3 2000 Antwerp  
4

5 Belgium  
6

7 Email: [idebaetselier@itg.be](mailto:idebaetselier@itg.be)  
8

9  
10 Telephone: +3232475444  
11

12 Wordcount excluding title page, abstract, references, figures and tables: 3332  
13  
14  
15  
16  
17  
18  
19  
20  
21  
22  
23  
24  
25  
26  
27  
28  
29  
30  
31  
32  
33  
34  
35  
36  
37  
38  
39  
40  
41  
42  
43  
44  
45  
46  
47  
48  
49  
50  
51  
52  
53  
54  
55  
56  
57  
58  
59  
60

For peer review only

## ABSTRACT:

Objectives: Pre-exposure prophylaxis (PrEP) users are screened bi-annual for Sexually Transmitted Infections (STIs). A novel device, called the Colli-Pee™, collects first-void urine in a standardized way and the collector tube can be easily delivered by regular post to a certified laboratory. The aim of the study was a one-to-one comparison between the STI test results obtained with the urine collected in the clinic, versus urine collected at home in a real-life setting by Men who have Sex with Men (MSM) in Belgium. The user-friendliness and acceptability of the Colli-Pee™ device by the users was also evaluated.

Design: A single-site nested sub-study in a prospective PrEP demonstration project (Be-PrEP-ared) among MSM in Belgium.

Participants: A total of 473 home-based samples from 213 MSM were received with a mean age of 38.5 years.

Interventions: Participants were requested to collect a urine sample at home using the Colli-Pee™ device and to send it to the laboratory via regular mail.

Primary and secondary outcome measures: The presence of *Chlamydia trachomatis* (CT), *Neisseria gonorrhoeae* (NG), *Mycoplasma genitalium* (MG) and *Trichomonas vaginalis* (TV) was determined using molecular amplification assays. Agreement between test results of samples collected at the clinic and collected at home were evaluated using Cohen's kappa statistic. Results: *Trichomonas vaginalis* was not detected. A very good to almost perfect agreement was found for CT, NG and MG of  $\kappa=0.75$ ; 0.87 and 0.85, respectively. Using the Colli-Pee™ device only one low positive CT and two MG infections were missed, however, three additional CT, two NG and six MG infections were detected.

1  
2  
3 Conclusions: The Colli-Pee™ device is a feasible and convenient way to collect urine at home for STI  
4 testing. This may be particularly relevant for populations that need frequent STI testing, such as PrEP  
5 users, and patients who prefer home-sampling.  
6  
7  
8  
9

10 Trial registration: Clinicaltrials.gov database: NCT02552914  
11  
12

## 13 14 15 ARTICLE SUMMARY

### 16 17 18 19 Strengths and limitations of this study

- 20 • The study was designed as such to provide real-world experience concerning home-based  
21 sampling for STI detection including shipment by post among PrEP users.  
22
- 23 • Home-based and clinic-based samples were processed and analyzed using the same  
24 procedures and laboratory staff was blinded for the results of the matching sample.  
25
- 26 • A total of 49 samples was found to be positive for an STI on 471 samples, resulting in a high  
27 prevalence of STIs: 10.4%.  
28
- 29 • Our main limitation is that home-based samples were not taken on the same day as clinic-  
30 based sampling and participants could have become positive during that window period.  
31
- 32 • Another limitation of the study is that the temperature during transportation of home-based  
33 samples to the clinic was not monitored. Large temperature variations could have an impact  
34 on the quality of the samples.  
35  
36  
37  
38  
39  
40  
41  
42  
43  
44  
45  
46

### 47 48 49 INTRODUCTION:

50  
51 According to the World Health Organisation's Global Health Sector Strategy on Sexually Transmitted  
52 Infections (STIs) 2016-2021, early diagnosis and linkage to treatment are one of the key elements for  
53 preventing further transmission of STIs.[1] Currently, first-void urine is still favoured as the sample of  
54 choice for the detection of *Chlamydia trachomatis* (CT) and *Neisseria gonorrhoeae* (NG) in men, using  
55 nucleic acid amplification tests (NAATs).[2–4] In general, a regular urine container is used to collect  
56  
57  
58  
59  
60

1  
2  
3 the first-void urine sample, but the collected volume of urine is not standardized. Furthermore, this  
4  
5 type of container is less convenient for postal delivery to the laboratory. Another sponged-based  
6  
7 device (UriSWAB, Copan Diagnostics, Brescia, Italy) has been suggested as an alternative for postal  
8  
9 delivery of urine. However, this device only holds 2 mL of urine and does not guarantee that only first-  
10  
11 void urine is collected.[4,5] The CE-IVD labelled Colli-Pee™ device (Novosanis, Belgium), provides a  
12  
13 clean and standardized solution to the above-mentioned issues as it efficiently captures first-void  
14  
15 urine (20 mL) without interruption of the urine flow and allows the samples to be sent by post. (Fig 1)  
16  
17 The Colli-Pee™ device is currently used for the detection of Human Papilloma Virus (HPV) and several  
18  
19 urological cancers for which collection of first-void urine is essential.[6,7] In the field of STIs, a  
20  
21 standardized first-void urine study reported that the organism load of *C. trachomatis* is maximal in the  
22  
23 first 4-5 mL and that the performance of diagnostic tests improved when using only first-void  
24  
25 urine.[8,9]  
26  
27  
28  
29  
30  
31  
32  
33

34 Although pre-exposure prophylaxis (PrEP) is becoming crucial in HIV prevention, recent reviews of  
35  
36 real-world PrEP demonstration studies showed that PrEP is associated with increased diagnoses of  
37  
38 STIs in Men who have Sex with Men (MSM).[10,11] Consequently, current guidelines recommend a  
39  
40 bi-annual screening of STIs in PrEP users because of their high risk behaviour.[12,13]  
41  
42

43 In order to facilitate the patient flow during follow-up visits by PrEP users, and prompt treatment of  
44  
45 STIs, home-based collection of first-void urine could be sent to the laboratory by regular mail for STI  
46  
47 detection before the scheduled visit. STI results may then be available at the time of the physician  
48  
49 consultation and in the case of a detected STI also immediately treated, limiting the risk of further  
50  
51 transmission.  
52  
53

54  
55 The objectives of this study were to compare the results of the molecular detection of several STIs  
56  
57 using the Colli-Pee™ device versus a sample obtained in the clinic, the use and acceptability of the  
58  
59 Colli-Pee™ device and its convenience for shipment by regular mail. To assess these objectives, a  
60

1  
2  
3 nested sub-study was performed among MSM who participated in a Belgian PrEP demonstration  
4 cohort. [14]  
5  
6  
7  
8  
9

## 10 11 12 **METHODS:** 13 14

15  
16 The evaluation was undertaken as a sub-study of Be-PrEP-ared, a PrEP demonstration study among  
17 MSM at high risk for HIV in Belgium.  
18  
19

### 20 21 22 **The main study** 23 24

25 The Be-PrEP-ared project (EudraCTn<sup>o</sup>: 5015-00005437) was a phase 3, single-site, open-label  
26 prospective cohort study where 200 MSM at high risk of acquiring HIV were asked to participate in  
27 the project and to take PrEP daily or event-driven. Detailed study methods are described  
28 elsewhere.[14] Participants were tested for *Neisseria gonorrhoeae* (NG), *Chlamydia trachomatis* (CT),  
29 *Mycoplasma genitalium* (MG) and *Trichomonas vaginalis* (TV) at baseline and every three months.  
30 Detection of these STIs was performed at the three biological sites: urethra, anorectum and pharynx.  
31 During each study visit, participants collected urine in two urine containers at the clinic as per the  
32 following instructions: urinate in the first container up to the marked line at approximately 20 mL,  
33 afterwards complete the second cup with no restrictions. Urine in the first container (hereafter the  
34 clinic-based sample) was weighed and thereafter stored refrigerated until analysis that took place  
35 within 48h. Urine in the second container was used to detect proteinuria.  
36  
37  
38  
39  
40  
41  
42  
43  
44  
45  
46  
47  
48  
49  
50  
51  
52  
53

### 54 55 56 **Laboratory procedures** 57 58

59 In the first instance, CT/NG detection was performed using the Abbott Real Time (RT) CT/NG assay  
60 (DNA extraction and sample preparation using Abbott m2000sp and the Abbott m2000rt system for



1  
2  
3 amplification and detection of CT/NG (Abbott Molecular Inc. Des Plaines, Illinois, USA)) according to  
4 manufacturer's instructions. The remainder of the urine and DNA extracts were stored at -80 °C. In  
5  
6 the case of positivity, the same DNA extracts were tested by in-house real time-PCR (RT-PCR) assays  
7  
8 for CT and/or NG, both based on previously published primer sets.[15,16]. A sample was considered  
9  
10 positive when positive in both the Abbott and the in-house RT-PCR. An initial positive Abbott assay  
11  
12 result followed by a negative confirmatory NAAT result was defined as 'not confirmed'. Inhibition of  
13  
14 the NAAT according to the Abbott assay was defined as 'inhibition'.  
15  
16  
17

18  
19 The same DNA extracts were used for further testing. MG was detected and reported using an  
20  
21 accredited in-house RT-PCR that targets the pdhD-gene [17] and in addition the DiaMGTV multiplex  
22  
23 kit (Diagenode diagnostics, Seraing, Belgium) that detects MG and TV simultaneously was used for TV  
24  
25 detection. The results for MG of the DiaMGTV multiplex kit were not used for reporting purposes and  
26  
27 are only provided for information only. No further confirmation of TV took place.  
28  
29  
30

### 31 **The Colli-Pee™ sub-study**

32  
33  
34 At the baseline visit of the Be-PrEP-ared study, participants were asked consent to participate in this  
35  
36 sub-study. After signing the informed consent form, they received a Colli-Pee™ device and a prepaid  
37  
38 envelope. They were instructed to collect first-void urine the next day at home using the Colli-Pee™  
39  
40 device (the home-based sample), to document the date and time of collection and to send the  
41  
42 collector tube filled with urine back to the laboratory by regular post, using the prepaid envelope.  
43  
44  
45 Upon receipt in the laboratory, the urine was weighed, stored refrigerated (2-8°C) and CT, NG, MG,  
46  
47 TV was detected using the same NAATs within 48 hours. The urine and DNA extracts' remnants were  
48  
49 stored at -80°C. The quantity of human cells was measured at baseline using a human Endogenous  
50  
51 Retrovirus-3 (ERV-3) quantitative PCR on the paired clinic- and home-based samples.[18]  
52  
53  
54

55  
56 The lab technicians were blinded for the results obtained for the clinic-based sample. In addition, the  
57  
58 result of the home-based sample was not disclosed to the physician or participant.  
59  
60

1  
2  
3 During the next visit, which took place within 14 days after baseline, participants were asked to  
4 complete a small survey (five questions only) on the user-friendliness and willingness to use the Colli-  
5 Pee™ device (acceptability). Two questions documenting their opinion (likes-dislikes) of the Colli-  
6 Pee™ device (acceptability). Two questions documenting their opinion (likes-dislikes) of the Colli-  
7 Pee™ device (acceptability). Two questions documenting their opinion (likes-dislikes) of the Colli-  
8 Pee™ device (acceptability). Two questions documenting their opinion (likes-dislikes) of the Colli-  
9 Pee™ device (acceptability). Two questions documenting their opinion (likes-dislikes) of the Colli-  
10 Pee™ device were open-ended.

11  
12 At follow-up month 6 and month 18 of the study, Colli-Pee™ devices were again distributed to those  
13 who agreed to participate and the survey was repeated at month 18 (results unreported).  
14

15  
16 The main study was approved by the Institutional Review Board of the Institute of Tropical Medicine  
17 and the Ethics Committee of the Antwerp University Hospital. In addition, a separate approval for this  
18 sub-study was obtained by the Institutional Review Board of the Institute of Tropical Medicine  
19 (Ref:1027/15) and this sub-study is also registered in the clinicaltrials.gov database (NCT02552914).  
20  
21  
22  
23  
24  
25  
26  
27

## 28 **Patient and Public Involvement**

29  
30 Patients were not involved in the Colli-Pee™ substudy. Patients were not invited to comment on the  
31 study design and were not consulted to develop patient relevant outcomes or interpret the results.  
32  
33 Patients were not invited to contribute to the writing or editing of this document for readability or  
34 accuracy.  
35  
36  
37  
38  
39  
40

## 41 **Statistical analysis**

42  
43 The agreement of the results of the molecular assays using each of the two sampling methods was  
44 assessed by the use of Cohen's kappa statistic and percent agreement. Samples that were not  
45 confirmed were coded as negative samples for the calculation of the agreement. The agreement of  
46 volume of urine collected and the agreement of concentration of human DNA in both sampling  
47 methods was assessed by using a t-test. A p-value of <0.05 was considered statistically significant.  
48  
49  
50  
51  
52  
53  
54  
55  
56 Both analyses were performed using STATA version 15.0 (StataCorp LP, College Station, TX, USA).  
57  
58  
59  
60

A descriptive analysis was made of the results of the self-administered questionnaire on the acceptability and user-friendliness of the Colli-Pee™ device.

## RESULTS

### Demographics

The main study took place at the Institute of Tropical Medicine, Antwerp, Belgium from Sep 2015 until May 2018. Of the 219 participants who were screened for eligibility into the main study, six participants did not consent to the Colli-Pee™ sub-study. All participants who consented to the sub-study were MSM and three identified themselves as transwomen.[19] The mean age of the participants was 38.5 years (Interquartile Range 32-44). A total of 473 home-based samples from 213 participants were received. Two home-based samples could not be linked to the corresponding clinic-based sample and were therefore excluded, bringing the total number to 471. As shown in Table 1, the number of home-based samples received at the laboratory declined over time.

| Kind Of Visit | Clinic based | Home Based (% home-based samples received) |
|---------------|--------------|--------------------------------------------|
| Screening     | 218          | 187 (85.8%)                                |
| Month 6       | 191          | 152 (79.6%)                                |
| Month 18      | 179          | 132 (73.7%)                                |

Table 1: Number of clinic and home-based samples received during the study

Although the participants were instructed to report the urine collection date and hour on the collection device, only 72.8% (343/471) were labelled with collection date. Most of the home-based samples (79.6%) were taken within two days after the clinic-based sample and 3.8% were taken after 20 days (13/343) (median one day; min-max: 0-70 days). The median time between the collection of the home-based sample and its reception at the laboratory after postal return was five days (min-max:

0-27 days), 72.9% arrived at the laboratory within those five days, an additional 25.7% within 10 days and five samples were received after 10 days (11, 13, 15, 17 and 27 days respectively).

## Comparison of weight and concentration of human material between both sampling methods.

A total of 455 home-based and 423 clinic-based samples were weighed. The mean net weight of the home-based sample was  $19.68\text{g} \pm 2.14\text{g}$  (95%CI: 19.5g-19.9g and min-max: 6.81g-39.47g) vs  $22.87\text{g} \pm 13.64\text{g}$  (95%CI: 21.6g-24.2g and min-max: 2.88g - 86.23g) for the clinic-based sample ( $p < 0.001$ ).

The quantity of human cells was analysed at baseline only ( $n=187$ ). In a total of five home-based and one clinic-based sample ERV could not be detected and these samples were considered as lacking human material. After removal of the paired samples lacking ERV or containing inhibitors, 182 observations could be paired. The mean quantity of the clinic-based sample was  $11.3 \times 10^3$  cells/PCR (95%CI: 7.4 -  $15.2 \times 10^3$ ) and for the home-based sample  $14.2 \times 10^3$  cells/PCR (95% CI: 6.8- $21.5 \times 10^3$ ) ( $p > 0.05$ ).

## STI results and agreement

Of the 471 home-based samples with a matching visit, six home-based and one clinic-based sample gave inhibition and were excluded from the analysis ( $n=464$ ). The results are shown in Table 2.

| STI                | Home-based urine result | Clinic-based urine results |          |       |
|--------------------|-------------------------|----------------------------|----------|-------|
|                    |                         | Negative                   | Positive | Total |
| <i>Chlamydia</i>   | Negative                | 454*                       | 1        | 455   |
| <i>trachomatis</i> | Positive                | 3                          | 6        | 9     |

| STI                              | Home-based<br>urine result | Clinic-based urine results |          |       |
|----------------------------------|----------------------------|----------------------------|----------|-------|
|                                  |                            | Negative                   | Positive | Total |
| <i>(non-LGV)</i>                 | <b>Total</b>               | 457                        | 7        | 464   |
| <i>Neisseria<br/>gonorrhoeae</i> | <b>Negative</b>            | 455                        | 0        | 455   |
|                                  | <b>Positive</b>            | 2                          | 7        | 9     |
|                                  | <b>Total</b>               | 457                        | 7        | 464   |
| <i>Mycoplasma<br/>genitalium</i> | <b>Negative</b>            | 431                        | 2        | 433   |
|                                  | <b>Positive</b>            | 6                          | 25       | 31    |
|                                  | <b>Total</b>               | 437                        | 27       | 464   |
| <i>Trichomonas<br/>vaginalis</i> | <b>Negative</b>            | 464                        | 0        | 464   |
|                                  | <b>Positive</b>            | 0                          | 0        | 0     |
|                                  | <b>Total</b>               | 464                        | 0        | 464   |

Table 2: STI results of the home-based and clinic-based urine samples

\* Two result were not-confirmed in the clinic-based sample

*Trichomonas vaginalis* was not detected. Percent agreement (Cohen's kappa coefficient) for CT/NG/MG is 99.1% (0.75); 99.6% (0.87) and 98.3% (0.85), respectively, which indicates substantial agreement for *Chlamydia trachomatis* and almost perfect agreement for the other two STIs.

Tables 3 and 4 show the discordant results. For some of the home-based samples the date of collection was unknown so the time between the clinic visit and time of reception at the laboratory is depicted here. A delta-cycle (DC) value of the Abbott assay of less than two indicates a low positive infection.

| STI | DC value | Ct value in-<br>house RT-PCR<br>for CT, NG or<br>MG* | Ct-value S-<br>DiagMGTV RT-PCR<br>(for information<br>only) | Days between<br>collection | Days of<br>transport |
|-----|----------|------------------------------------------------------|-------------------------------------------------------------|----------------------------|----------------------|
| CT  | 1.49     | 33.19                                                | NA                                                          | 0                          | 2                    |

|           |    |       |       |   |   |
|-----------|----|-------|-------|---|---|
| <b>MG</b> | NA | 32.20 | Neg   | 3 | 4 |
| <b>MG</b> | NA | 32.04 | 37.44 | 0 | 8 |

Table 3: STI infections that were not detected in home-based urine samples

\*: a different in-house RT-PCR assay was used for CT, NG or MG

DC = delta cycle; Ct = Cycle threshold; NA = not applicable; Max = days between clinic visit and reception of the home-based sample at the laboratory

| STI       | DC value | Ct value in-house RT-PCR for CT, NG or MG* | Ct-value S-DiagMGTV RT-PCR (for information only) | Days between collection | Days of transport |
|-----------|----------|--------------------------------------------|---------------------------------------------------|-------------------------|-------------------|
| <b>CT</b> | 3.99     | 34.26                                      | NA                                                | 1                       | 2                 |
| <b>CT</b> | 2.68     | 35.31                                      | NA                                                | 1                       | 6                 |
| <b>CT</b> | 0.27     | 36.06                                      | NA                                                | 6                       | 4                 |
| <b>NG</b> | 2.93     | 37.58                                      | NA                                                | 8                       | 4                 |
| <b>NG</b> | 10.08    | 25.26                                      | NA                                                | 2                       | 6                 |
| <b>MG</b> | NA       | 31.28                                      | Neg                                               | Max 6                   | Max 6             |
| <b>MG</b> | NA       | 31.96                                      | 40.51                                             | 1                       | 2                 |
| <b>MG</b> | NA       | 28.66                                      | 34.67                                             | Max 3                   | Max 3             |
| <b>MG</b> | NA       | 34.58                                      | 38.50                                             | 9                       | 4                 |
| <b>MG</b> | NA       | 34.23                                      | Neg                                               | 1                       | 5                 |
| <b>MG</b> | NA       | 32.04                                      | 38.14                                             | Max 3                   | Max 3             |

Table 4: STI infections that were additionally detected in home-based urine samples

\*: a different in-house RT-PCR assay was used for CT, NG or MG

DC = delta cycle; Ct = Cycle threshold; NA = not applicable; Max = days between clinic visit and reception of the home-based sample at the laboratory

## Acceptability and user-friendliness of the Colli-Pee™ device

A total of 164 participants provided feedback regarding the use of the Colli-Pee™ device at baseline.

On a scale of one to five, 87.8% found that the Colli-Pee™ device was easy to very easy to use.

Instructions on how to send the Colli-Pee™ device were found to be easy by 90.2% of the participants.

Four participants found the Colli-Pee™ difficult to use (2.4%) and four other participants found it difficult to follow the instructions (2.4%). Likes from participants were: the ease of use (54.9%), no interruption of the urine flow (15.9%), hygienic (11.6%) and privacy of the home-based sample collection (11.0%); the dislikes were: nothing (47.0%), not being recyclable (14.6%), not hygienic (10.4%) and being too large (6.1%).

To the question of whether they would order an online STI test, 89.0% answered positively (146/164) and 91.1% (133/146) of those individuals would use the Colli-Pee™ device in that case. Six participants (4.1%) would not want to use the Colli-Pee™ device when ordering an online STI test. Participants were also asked how much they would pay for an online STI test with self-sampling. Price indications ranged from 0€ (10 participants) to 60€. Most of the participants (89/164) were willing to pay 10-20€.

## DISCUSSION

Many studies have reported on male self-collected urine versus urethra clinician-collected sampling for STI screening, but 'real-world' studies, including sending of home-based urine samples for STI detection in men by post, are sparse.[4,5,20,21] In this study, we showed that the Colli-Pee™ collection device is a valuable and reliable method for collecting first-void urine for STI detection in MSM in Belgium, and that the collector can be shipped by regular post. Compared to the clinic-based sample, a total of three STIs (one CT and two MG infections) were not detected in the home-based sample. However, 11 additional infections were found in home-based samples collected with the Colli-

1  
2  
3 Pee™ device (3 CT, 2 NG and 6 MG infections). This high number of additional STIs could be explained  
4  
5 by the fact that first-void urine contains more DNA/RNA than mid-stream and, as a consequence,  
6  
7 should still be used for STI detection.[9] Indeed, we showed that using the Colli-Pee™ device first-void  
8  
9 urine was collected in a more standardized way compared to the clinic-based samples ( $p < 0.001$ ).  
10  
11 Also, more human cells were collected in the home-based samples, however statistical significance  
12  
13 was lacking. The fact that participants could become positive during the time in between sampling  
14  
15 points is one of our main limitations and cannot be ignored. Preliminary data of the Be-PrEP-ared  
16  
17 study showed high incidence estimates after twelve months of the main Be-PrEP-ared study for  
18  
19 urethral CT/NG and MG: 11.5, 5.1 and 6.9 incidence rate per 100 person-years respectively.  
20  
21  
22

23  
24 Nevertheless, the most important observation is that only one Chlamydia positive result was missed.  
25  
26 The DC value of the Abbott assay performed on that clinic-based sample highlighted the low bacterial  
27  
28 load of that infection; in addition, transportation at room temperature for two days could have  
29  
30 induced DNA degradation.  
31  
32

33  
34 The World Health Organisation (WHO) underlines the importance of integrating point-of-care assays  
35  
36 (POCTs) including innovative delivery options such as self-testing. [22] Unfortunately, to our  
37  
38 knowledge, current commercial POCTs for the most important STIs such as *Chlamydia trachomatis*  
39  
40 and *Neisseria gonorrhoeae* are still of sub-optimal quality and do not meet the ASSURED criteria that  
41  
42 were developed by the WHO STI Diagnostics Initiative.[22–25] A solution to the unavailability of  
43  
44 qualitative POCTs could be internet-accessed STI testing (e-STI testing) which is increasingly available  
45  
46 as an alternative to clinic testing all over the world.[26] E-STI testing includes postal self-sampling test  
47  
48 kits that are sent to a certified laboratory and web-based delivery of test results. Swab2Know, an  
49  
50 online HIV testing project confirmed that e-HIV testing is acceptable and feasible among MSM in  
51  
52 Belgium. [27] Commercial online self-sampling services for STIs are now emerging over the internet,  
53  
54 but evaluation of these services is lacking.  
55  
56  
57  
58  
59  
60



1  
2  
3 The present study is, however, subject to several limitations. Firstly, we only enrolled Be-PrEP-ared  
4 participants and the participation level seriously declined during the study. As a result, our number of  
5 CT/NG positives is quite low, which precludes firm conclusions. Secondly, as mentioned above, home-  
6 based samples were not taken on the same day as clinic-based sampling and participants could have  
7 become positive during that window period. We also do not know whether participants had urinated  
8 one hour prior to collection. However, recent data show that the time between micturition is not  
9 crucial for the detection of Chlamydia in men.[28] Thirdly, we did not monitor the temperature of the  
10 transport of home-based samples which could also have an impact on the quality of the samples,  
11 however, outside temperature between Oct 2015 and May 2018 varied between -10°C to 33°C with  
12 an average of 11°C.  
13  
14  
15  
16  
17  
18  
19  
20  
21  
22  
23  
24  
25

26 Fourthly, we cannot exclude specimen contamination, however, participants were instructed how to  
27 correctly collect the clinic-based and home-based sample. Finally, reporting bias is also not to be  
28 excluded. Not all participants who used a Colli-Pee™ device completed the survey, the additional  
29 questions were included at the end of the lengthy main questionnaire of the Be-PrEP-ared study.  
30  
31  
32  
33  
34  
35

36 Besides PrEP users, e-STI testing has the potential to reach those who are most in need and a recent  
37 study showed that some higher-risk groups, such as MSM, were more likely to use online services  
38 [26,29]. Many studies have shown that home-based sampling is well accepted and, in fact, is the  
39 preferred approach in these groups for STIs. Reasons for choosing home-based sampling were shorter  
40 waiting times for results, convenience and less embarrassment. [30] Participants views regarding  
41 ordering an online STI test in this study were very positive, 89% would like to order such a kit. The  
42 Colli-Pee™ device was also found to be easy (90.2%) and although hygiene was one of the likes, it also  
43 appeared in the dislikes, probably because the need to detach the collector manually can cause  
44 leakage of urine. Participants were also concerned regarding possible ecological consequences,  
45 although the plastic material is recyclable and can be incinerated into energy.  
46  
47  
48  
49  
50  
51  
52  
53  
54  
55  
56  
57  
58  
59  
60

1  
2  
3 We demonstrated that postal delivery of home-based collected urine does not influence STI detection  
4 and can be used among PrEP users. Subsequently, PrEP users will be able to send first-void urine to  
5 the laboratory with the Colli-Pee™ device one to two weeks before their routine PrEP follow up visit.  
6  
7 Results can then be discussed during the physician consultation and followed by treatment and future  
8 antimicrobial testing if applicable, decreasing the number of physician visits. Decreasing the number  
9 of face-to-face visits will lower the burden on staff workload and healthcare resources. However,  
10 future economic evaluations will need to be conducted to prove this statement. E-STI testing could be  
11 a promising approach in Belgium to reach patients in hard-to-reach populations and research on this  
12 topic should be stimulated. Therefore, future studies to study the acceptability and impact of postal  
13 shipment of home-collected material on the performance of STI assays requires additional  
14 assessment.  
15  
16  
17  
18  
19  
20  
21  
22  
23  
24  
25  
26  
27  
28  
29  
30

31 Figure legend: Fig 1: The Colli-Pee™ device instructions for use.  
32

## 33 34 35 **ACKNOWLEDGEMENTS** 36 37 38

39 We would like to thank all the participants of the Be-PrEP-ared study who participated in this small  
40 study. We also would like to thank Be-PrEP-ared study group but especially Maureen Aerts who was  
41 crucial in the participation level of this study. Finally we would like to thank Wendy Thys for the data  
42 entry.  
43  
44  
45  
46  
47  
48

## 49 50 **COMPETING INTERESTS STATEMENT** 51 52 53

54 The authors have no competing interests to declare.  
55  
56  
57  
58  
59  
60

## FUNDING STATEMENT

This work was supported by Novosanis who provided the Colli-Pee™ devices and partially paid for the analyses performed on the home-based samples. In addition, a grant was obtained from the Flemish Agency for Innovation and Entrepreneurship to conduct the Be-PrEP-ared study.

## DATASHARING STATEMENT

The data will be made publicly available except for the use and acceptability data as these will be retained at the Institute of Tropical Medicine (ITM), Antwerp due to ethical and privacy concerns. According to the ITM research data sharing policy, only fully anonymised data can be shared publicly. The data can however be made available after approval of a motivated and written request to the ITM at ITMresearchdataaccess@itg.be. The ITM data access committee will verify if the dataset is suitable for obtaining the study objective and assure that confidentiality and ethical requirements are in place.

## CONTRIBUTORSHIP STATEMENT

IDB, TC, and BV designed the study. TR designed the acceptability survey. IDB performed the statistical analysis and wrote the first draft of the manuscript. HS, BDD, VC, SA performed testing. All authors read the final version of the manuscript and provided comments.

## REFERENCES

- 1 WHO. Global Health Sector Strategy on Sexually Transmitted Infections 2016-2021. *World Heal Organ* 2016;**1**:63. doi:10.1055/s-2007-970201.
- 2 Lanjouw E, Ouburg S, de Vries H, *et al*. 2015 European guideline on the management of *Chlamydia trachomatis* infections. *Int J STD AIDS* 2016;**27**:333–48.

- 1  
2  
3 doi:10.1177/0956462415618837  
4  
5  
6 3 Bignell C, Unemo M, Radcliffe K, *et al.* 2012 European guideline on the diagnosis and  
7  
8 treatment of gonorrhoea in adults. *Int J STD AIDS* 2013;**24**:85–92.  
9  
10 doi:10.1177/0956462412472837  
11  
12  
13 4 Lunny C, Taylor D, Hoang L, *et al.* Self-Collected versus Clinician-Collected Sampling for  
14  
15 Chlamydia and Gonorrhoea Screening: A Systemic Review and Meta-Analysis. *PLoS One*  
16  
17 2015;**10**:e0132776. doi:10.1371/journal.pone.0132776  
18  
19  
20  
21 5 McNicol J, Debattista J. Use of the UriSwab collection device for testing of *Chlamydia*  
22  
23 *trachomatis* and *Neisseria gonorrhoeae* : implications for a postal testing service. *Int J STD*  
24  
25 *AIDS* 2013;**24**:477–80. doi:10.1177/0956462412472834  
26  
27  
28 6 Vorsters A, Van den Bergh J, Micalessi I, *et al.* Optimization of HPV DNA detection in urine by  
29  
30 improving collection, storage, and extraction. *Eur J Clin Microbiol Infect Dis* 2014;**33**:2005–14.  
31  
32 doi:10.1007/s10096-014-2147-2  
33  
34  
35 7 Theodorescu D, Schiffer E, Bauer HW, *et al.* Discovery and validation of urinary biomarkers for  
36  
37 prostate cancer. *Proteomics Clin Appl* 2008;**2**:556–70. doi:10.1002/prca.200780082  
38  
39  
40 8 Wisniewski CA, White JA, Michel C-EC, *et al.* Optimal method of collection of first-void urine  
41  
42 for diagnosis of *Chlamydia trachomatis* infection in men. *J Clin Microbiol* 2008;**46**:1466–9.  
43  
44 doi:10.1128/JCM.02241-07  
45  
46  
47 9 Johnson DJ, Calderaro AC, Roberts KA. Variation in Nuclear DNA Concentrations During  
48  
49 Urination. *J Forensic Sci* 2007;**52**:110–3. doi:10.1111/j.1556-4029.2006.00329.x  
50  
51  
52  
53 10 Traeger MW, Schroeder SE, Wright EJ, *et al.* Effects of Pre-exposure Prophylaxis for the  
54  
55 Prevention of Human Immunodeficiency Virus Infection on Sexual Risk Behavior in Men Who  
56  
57 Have Sex With Men: A Systematic Review and Meta-analysis. *Clin Infect Dis* Published Online  
58  
59 First: 2 March 2018. doi:10.1093/cid/ciy182  
60

- 1  
2  
3 11 Kojima N, Davey DJ, Klausner JD. Pre-exposure prophylaxis for human immunodeficiency  
4 virus and sexually transmitted infection acquisition among men who have sex with men. *AIDS*  
5  
6 Published Online First: 2016. doi:10.1097/QAD.0000000000001185  
7  
8  
9  
10  
11 12 Salazar NAMEJ. EACS HIV guidelines 8.1. 2016.  
12  
13  
14 13 WHO implementation tool for pre-exposure prophylaxis (PrEP) of HIV infection. *Geneva*  
15  
16 *World Heal Organ* Published Online First: 2017.[http://www.who.int/hiv/pub/prep/prep-](http://www.who.int/hiv/pub/prep/prep-implementation-tool/en/)  
17  
18 [implementation-tool/en/](http://www.who.int/hiv/pub/prep/prep-implementation-tool/en/) (accessed 21 Aug 2018).  
19  
20  
21 14 De Baetselier I, Reyniers T, Nöstlinger C, *et al.* Pre-Exposure Prophylaxis (PrEP) as an  
22  
23 Additional Tool for HIV Prevention Among Men Who Have Sex With Men in Belgium: The Be-  
24  
25 PrEP-ared Study Protocol. *JMIR Res Protoc* 2017;**6**:e11. doi:10.2196/resprot.6767  
26  
27  
28 15 Chen C-Y, Chi KH, Alexander S, *et al.* A real-time quadriplex PCR assay for the diagnosis of  
29  
30 rectal lymphogranuloma venereum and non-lymphogranuloma venereum Chlamydia  
31  
32 trachomatis infections. *Sex Transm Infect* 2008;**84**:273–6. doi:10.1136/sti.2007.029058  
33  
34  
35 16 Hopkins MJ, Ashton LJ, Alloba F, *et al.* Validation of a laboratory-developed real-time PCR  
36  
37 protocol for detection of Chlamydia trachomatis and Neisseria gonorrhoeae in urine. *Sex*  
38  
39 *Transm Infect* 2010;**86**:207–11. doi:10.1136/sti.2009.040634  
40  
41  
42 17 Müller EE, Venter JME, Magooa MP, *et al.* Development of a rotor-gene real-time PCR assay  
43  
44 for the detection and quantification of Mycoplasma genitalium. *J Microbiol Methods*  
45  
46 2012;**88**:311–5. doi:10.1016/j.mimet.2011.12.017  
47  
48  
49 18 Yuan CC, Miley W, Waters D. A quantification of human cells using an ERV-3 real time PCR  
50  
51 assay. *J Virol Methods* 2001;**91**:109–17.  
52  
53  
54  
55 19 Reyniers T, Nöstlinger C, Laga M, *et al.* Choosing between daily and event-driven Pre-  
56  
57 Exposure Prophylaxis: results of a Belgian PrEP demonstration project Conflict of Interest and  
58  
59 Source of Funding: A grant was obtained from the Flemish Agency for. *JAIDS J Acquir Immune*  
60

- 1  
2  
3 *Defic Syndr Publ Ahead Print* doi:10.1097/QAI.0000000000001791  
4  
5  
6 20 Morr  SA, van Valkengoed IG, de Jong A, *et al*. Mailed, home-obtained urine specimens: a  
7  
8 reliable screening approach for detecting asymptomatic Chlamydia trachomatis infections. *J*  
9  
10 *Clin Microbiol* 1999;**37**:976–80.<http://www.ncbi.nlm.nih.gov/pubmed/10074512> (accessed  
11  
12 21 Aug 2018).
- 13  
14  
15 21 Fajardo-Bernal L, Aponte-Gonzalez J, Vigil P, *et al*. Home-based versus clinic-based specimen  
16  
17 collection in the management of Chlamydia trachomatis and Neisseria gonorrhoeae  
18  
19 infections. *Cochrane Database Syst Rev* 2015;:CD011317.  
20  
21 doi:10.1002/14651858.CD011317.pub2  
22  
23  
24  
25 22 Toskin I, Blondeel K, Peeling RW, *et al*. Advancing point of care diagnostics for the control and  
26  
27 prevention of STIs: the way forward. *Sex Transm Infect* 2017;**93**:S81–8. doi:10.1136/sextrans-  
28  
29 2016-053073  
30  
31  
32  
33 23 De Baetselier I, Mwambarangwe L, Cuylaerts V, *et al*. Evaluation of an enzymatic Chlamydia  
34  
35 trachomatis point-of-care rapid assay in Rwanda: the BioChekSwab Rapid Test. *Sex Transm*  
36  
37 *Infect* Published Online First: 16 October 2015. doi:10.1136/sextrans-2015-052202  
38  
39  
40  
41 24 Peeling RW, Holmes KK, Mabey D, *et al*. Rapid tests for sexually transmitted infections (STIs):  
42  
43 the way forward. *Sex Transm Infect* 2006;**82**:v1–6. doi:10.1136/sti.2006.024265  
44  
45  
46 25 European Centre for Disease Prevention and Control. Novel approaches to testing for sexually  
47  
48 transmitted infections, including HIV and hepatitis B and C in Europe. Stockholm: 2012.  
49  
50 doi:10.2900/6481  
51  
52  
53 26 Wilson E, Free C, Morris TP, *et al*. Internet-accessed sexually transmitted infection (e-STI)  
54  
55 testing and results service: A randomised, single-blind, controlled trial. *PLOS Med*  
56  
57 2017;**14**:e1002479. doi:10.1371/journal.pmed.1002479  
58  
59  
60 27 Platteau T, Fransen K, Apers L, *et al*. Swab2know: An HIV-Testing Strategy Using Oral Fluid

- 1  
2  
3 Samples and Online Communication of Test Results for Men Who Have Sex With Men in  
4 Belgium. *J Med Internet Res* 2015;**17**:e213. doi:10.2196/jmir.4384  
5  
6  
7  
8 28 Mathew T, O'Mahony C, Mallinson H. Shortening the voiding interval for men having  
9 chlamydia nucleic acid amplification tests. *Int J STD AIDS* 2009;**20**:752–3.  
10  
11 doi:10.1258/ijisa.2009.009225  
12  
13  
14  
15 29 Barnard S, Free C, Bakolis I, *et al*. Comparing the characteristics of users of an online service  
16 for STI self-sampling with clinic service users: a cross-sectional analysis. *Sex Transm Infect*  
17  
18 2018;:sextrans-2017-053302. doi:10.1136/sextrans-2017-053302  
19  
20  
21  
22  
23 30 Paudyal P, Llewellyn C, Lau J, *et al*. Obtaining self-samples to diagnose curable sexually  
24 transmitted infections: a systematic review of patients' experiences. *PLoS One*  
25  
26 2015;**10**:e0124310. doi:10.1371/journal.pone.0124310  
27  
28  
29  
30  
31  
32  
33  
34  
35  
36  
37  
38  
39  
40  
41  
42  
43  
44  
45  
46  
47  
48  
49  
50  
51  
52  
53  
54  
55  
56  
57  
58  
59  
60

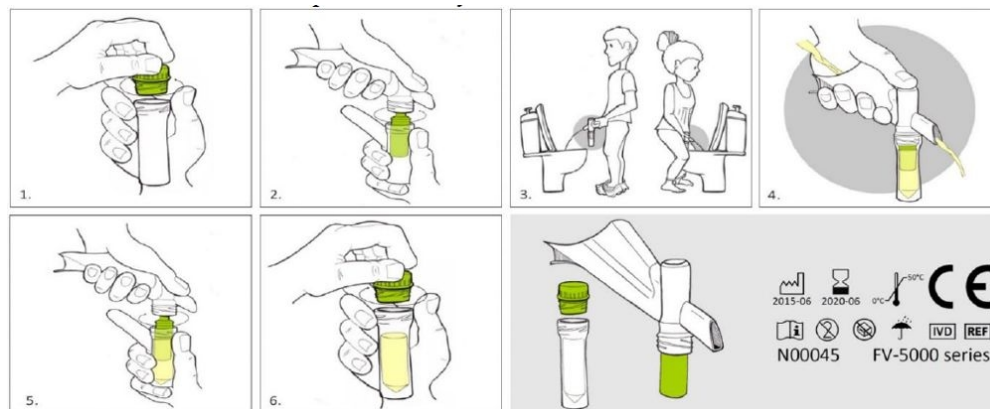

Fig 1: The Colli-Pee™ device instructions for use.

268x110mm (95 x 95 DPI)



| Section & Topic          | No         | Item                                                                                                                                                   | Reported on page #                                                                           |
|--------------------------|------------|--------------------------------------------------------------------------------------------------------------------------------------------------------|----------------------------------------------------------------------------------------------|
| <b>TITLE OR ABSTRACT</b> |            |                                                                                                                                                        |                                                                                              |
|                          | <b>1</b>   | Identification as a study of diagnostic accuracy using at least one measure of accuracy (such as sensitivity, specificity, predictive values, or AUC)  | 2 (agreement was used as this is not a diagnostic study)                                     |
| <b>ABSTRACT</b>          |            |                                                                                                                                                        |                                                                                              |
|                          | <b>2</b>   | Structured summary of study design, methods, results, and conclusions (for specific guidance, see STARD for Abstracts)                                 | 2                                                                                            |
| <b>INTRODUCTION</b>      |            |                                                                                                                                                        |                                                                                              |
|                          | <b>3</b>   | Scientific and clinical background, including the intended use and clinical role of the index test                                                     | 3-4                                                                                          |
|                          | <b>4</b>   | Study objectives and hypotheses                                                                                                                        | 4                                                                                            |
| <b>METHODS</b>           |            |                                                                                                                                                        |                                                                                              |
| <i>Study design</i>      | <b>5</b>   | Whether data collection was planned before the index test and reference standard were performed (prospective study) or after (retrospective study)     | 5                                                                                            |
| <i>Participants</i>      | <b>6</b>   | Eligibility criteria                                                                                                                                   | 5                                                                                            |
|                          | <b>7</b>   | On what basis potentially eligible participants were identified (such as symptoms, results from previous tests, inclusion in registry)                 | 5-6                                                                                          |
|                          | <b>8</b>   | Where and when potentially eligible participants were identified (setting, location and dates)                                                         | 5                                                                                            |
|                          | <b>9</b>   | Whether participants formed a consecutive, random or convenience series                                                                                | 5-6                                                                                          |
| <i>Test methods</i>      | <b>10a</b> | Index test, in sufficient detail to allow replication                                                                                                  | Not applicable same assay was used on both samples (but different kind of sample)            |
|                          | <b>10b</b> | Reference standard, in sufficient detail to allow replication                                                                                          | Not applicable same assay was used on both samples (but different kind of sample)            |
|                          | <b>11</b>  | Rationale for choosing the reference standard (if alternatives exist)                                                                                  | Not applicable same assay was used on both samples (but different kind of sample)            |
|                          | <b>12a</b> | Definition of and rationale for test positivity cut-offs or result categories of the index test, distinguishing pre-specified from exploratory         | 5-6                                                                                          |
|                          | <b>12b</b> | Definition of and rationale for test positivity cut-offs or result categories of the reference standard, distinguishing pre-specified from exploratory | 5-6                                                                                          |
|                          | <b>13a</b> | Whether clinical information and reference standard results were available to the performers/readers of the index test                                 | 6                                                                                            |
|                          | <b>13b</b> | Whether clinical information and index test results were available to the assessors of the reference standard                                          | 6                                                                                            |
| <i>Analysis</i>          | <b>14</b>  | Methods for estimating or comparing measures of diagnostic accuracy                                                                                    | 7                                                                                            |
|                          | <b>15</b>  | How indeterminate index test or reference standard results were handled                                                                                | 6                                                                                            |
|                          | <b>16</b>  | How missing data on the index test and reference standard were handled                                                                                 | Not applicable                                                                               |
|                          | <b>17</b>  | Any analyses of variability in diagnostic accuracy, distinguishing pre-specified from exploratory                                                      | Not applicable                                                                               |
|                          | <b>18</b>  | Intended sample size and how it was determined                                                                                                         | Not applicable                                                                               |
| <b>RESULTS</b>           |            |                                                                                                                                                        |                                                                                              |
| <i>Participants</i>      | <b>19</b>  | Flow of participants, using a diagram                                                                                                                  | We did not include of flow of participants, however this has been discussed in the text p7-8 |

|    |                          |            |                                                                                                             |                                     |
|----|--------------------------|------------|-------------------------------------------------------------------------------------------------------------|-------------------------------------|
| 1  |                          | <b>20</b>  | Baseline demographic and clinical characteristics of participants                                           | 7-8                                 |
| 2  |                          | <b>21a</b> | Distribution of severity of disease in those with the target condition                                      | Not applicable                      |
| 3  |                          | <b>21b</b> | Distribution of alternative diagnoses in those without the target condition                                 | Not applicable                      |
| 4  |                          | <b>22</b>  | Time interval and any clinical interventions between index test and reference standard                      | 8                                   |
| 5  | <i>Test results</i>      | <b>23</b>  | Cross tabulation of the index test results (or their distribution) by the results of the reference standard | 8                                   |
| 6  |                          | <b>24</b>  | Estimates of diagnostic accuracy and their precision (such as 95% confidence intervals)                     | Cohen's kappa agreement was used p9 |
| 7  |                          | <b>25</b>  | Any adverse events from performing the index test or the reference standard                                 | Not applicable                      |
| 8  |                          |            |                                                                                                             |                                     |
| 9  |                          |            |                                                                                                             |                                     |
| 10 |                          | <b>25</b>  | Any adverse events from performing the index test or the reference standard                                 | Not applicable                      |
| 11 | <b>DISCUSSION</b>        |            |                                                                                                             |                                     |
| 12 |                          | <b>26</b>  | Study limitations, including sources of potential bias, statistical uncertainty, and generalisability       | 13                                  |
| 13 |                          | <b>27</b>  | Implications for practice, including the intended use and clinical role of the index test                   | 13-14                               |
| 14 |                          |            |                                                                                                             |                                     |
| 15 | <b>OTHER INFORMATION</b> |            |                                                                                                             |                                     |
| 16 |                          |            |                                                                                                             |                                     |
| 17 |                          | <b>28</b>  | Registration number and name of registry                                                                    | 6                                   |
| 18 |                          | <b>29</b>  | Where the full study protocol can be accessed                                                               | Will be added as appendix           |
| 19 |                          | <b>30</b>  | Sources of funding and other support; role of funders                                                       | 15                                  |
| 20 |                          |            |                                                                                                             |                                     |
| 21 |                          |            |                                                                                                             |                                     |
| 22 |                          |            |                                                                                                             |                                     |
| 23 |                          |            |                                                                                                             |                                     |
| 24 |                          |            |                                                                                                             |                                     |
| 25 |                          |            |                                                                                                             |                                     |
| 26 |                          |            |                                                                                                             |                                     |
| 27 |                          |            |                                                                                                             |                                     |
| 28 |                          |            |                                                                                                             |                                     |
| 29 |                          |            |                                                                                                             |                                     |
| 30 |                          |            |                                                                                                             |                                     |
| 31 |                          |            |                                                                                                             |                                     |
| 32 |                          |            |                                                                                                             |                                     |
| 33 |                          |            |                                                                                                             |                                     |
| 34 |                          |            |                                                                                                             |                                     |
| 35 |                          |            |                                                                                                             |                                     |
| 36 |                          |            |                                                                                                             |                                     |
| 37 |                          |            |                                                                                                             |                                     |
| 38 |                          |            |                                                                                                             |                                     |
| 39 |                          |            |                                                                                                             |                                     |
| 40 |                          |            |                                                                                                             |                                     |
| 41 |                          |            |                                                                                                             |                                     |
| 42 |                          |            |                                                                                                             |                                     |
| 43 |                          |            |                                                                                                             |                                     |
| 44 |                          |            |                                                                                                             |                                     |
| 45 |                          |            |                                                                                                             |                                     |
| 46 |                          |            |                                                                                                             |                                     |
| 47 |                          |            |                                                                                                             |                                     |
| 48 |                          |            |                                                                                                             |                                     |
| 49 |                          |            |                                                                                                             |                                     |
| 50 |                          |            |                                                                                                             |                                     |
| 51 |                          |            |                                                                                                             |                                     |
| 52 |                          |            |                                                                                                             |                                     |
| 53 |                          |            |                                                                                                             |                                     |
| 54 |                          |            |                                                                                                             |                                     |
| 55 |                          |            |                                                                                                             |                                     |
| 56 |                          |            |                                                                                                             |                                     |
| 57 |                          |            |                                                                                                             |                                     |
| 58 |                          |            |                                                                                                             |                                     |
| 59 |                          |            |                                                                                                             |                                     |
| 60 |                          |            |                                                                                                             |                                     |

# STARD 2015

---

## AIM

STARD stands for “Standards for Reporting Diagnostic accuracy studies”. This list of items was developed to contribute to the completeness and transparency of reporting of diagnostic accuracy studies. Authors can use the list to write informative study reports. Editors and peer-reviewers can use it to evaluate whether the information has been included in manuscripts submitted for publication.

---

## EXPLANATION

A **diagnostic accuracy study** evaluates the ability of one or more medical tests to correctly classify study participants as having a **target condition**. This can be a disease, a disease stage, response or benefit from therapy, or an event or condition in the future. A medical test can be an imaging procedure, a laboratory test, elements from history and physical examination, a combination of these, or any other method for collecting information about the current health status of a patient.

The test whose accuracy is evaluated is called **index test**. A study can evaluate the accuracy of one or more index tests. Evaluating the ability of a medical test to correctly classify patients is typically done by comparing the distribution of the index test results with those of the **reference standard**. The reference standard is the best available method for establishing the presence or absence of the target condition. An accuracy study can rely on one or more reference standards.

If test results are categorized as either positive or negative, the cross tabulation of the index test results against those of the reference standard can be used to estimate the **sensitivity** of the index test (the proportion of participants *with* the target condition who have a positive index test), and its **specificity** (the proportion *without* the target condition who have a negative index test). From this cross tabulation (sometimes referred to as the contingency or “2x2” table), several other accuracy statistics can be estimated, such as the positive and negative **predictive values** of the test. Confidence intervals around estimates of accuracy can then be calculated to quantify the statistical **precision** of the measurements.

If the index test results can take more than two values, categorization of test results as positive or negative requires a **test positivity cut-off**. When multiple such cut-offs can be defined, authors can report a receiver operating characteristic (ROC) curve which graphically represents the combination of sensitivity and specificity for each possible test positivity cut-off. The **area under the ROC curve** informs in a single numerical value about the overall diagnostic accuracy of the index test.

The **intended use** of a medical test can be diagnosis, screening, staging, monitoring, surveillance, prediction or prognosis. The **clinical role** of a test explains its position relative to existing tests in the clinical pathway. A replacement test, for example, replaces an existing test. A triage test is used before an existing test; an add-on test is used after an existing test.

Besides diagnostic accuracy, several other outcomes and statistics may be relevant in the evaluation of medical tests. Medical tests can also be used to classify patients for purposes other than diagnosis, such as staging or prognosis. The STARD list was not explicitly developed for these other outcomes, statistics, and study types, although most STARD items would still apply.

---

## DEVELOPMENT

This STARD list was released in 2015. The 30 items were identified by an international expert group of methodologists, researchers, and editors. The guiding principle in the development of STARD was to select items that, when reported, would help readers to judge the potential for bias in the study, to appraise the applicability of the study findings and the validity of conclusions and recommendations. The list represents an update of the first version, which was published in 2003.

More information can be found on <http://www.equator-network.org/reporting-guidelines/stard>.

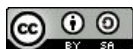

# BMJ Open

## EVALUATION OF THE "COLLI-PEETM", A FIRST-VOID URINE COLLECTION DEVICE FOR SELF-SAMPLING AT HOME FOR THE DETECTION OF SEXUALLY TRANSMITTED INFECTIONS, VERSUS A ROUTINE CLINIC BASED URINE COLLECTION IN A ONE-TO-ONE COMPARISON STUDY DESIGN: EFFICACY AND ACCEPTABILITY AMONG MSM IN BELGIUM

|                                 |                                                                                                                                                                                                                                                                                                                                                                                                                                                                                                                                                                                                                                                                             |
|---------------------------------|-----------------------------------------------------------------------------------------------------------------------------------------------------------------------------------------------------------------------------------------------------------------------------------------------------------------------------------------------------------------------------------------------------------------------------------------------------------------------------------------------------------------------------------------------------------------------------------------------------------------------------------------------------------------------------|
| Journal:                        | <i>BMJ Open</i>                                                                                                                                                                                                                                                                                                                                                                                                                                                                                                                                                                                                                                                             |
| Manuscript ID                   | bmjopen-2018-028145.R2                                                                                                                                                                                                                                                                                                                                                                                                                                                                                                                                                                                                                                                      |
| Article Type:                   | Research                                                                                                                                                                                                                                                                                                                                                                                                                                                                                                                                                                                                                                                                    |
| Date Submitted by the Author:   | 28-Feb-2019                                                                                                                                                                                                                                                                                                                                                                                                                                                                                                                                                                                                                                                                 |
| Complete List of Authors:       | De Baetselier, Irith; Institute of Tropical Medicine, Department of Clinical Sciences<br>Smet, Hilde; Institute of Tropical Medicine, Department of Clinical Sciences<br>Abdellati, Said; Institute of Tropical Medicine, Department of Clinical Sciences<br>De Deken, Bénédicte; Institute of Tropical Medicine, Department of Clinical Sciences<br>Cuylaerts, Vicky; Institute of Tropical Medicine, Department of Clinical Sciences<br>Reyniers, Thijs; Institute of Tropical Medicine, Department of Public Health<br>Vuylsteke, Bea; Institute of Tropical Medicine, Public Health<br>Crucitti, Tania; Institute of Tropical Medicine, Department of Clinical Sciences |
| <b>Primary Subject Heading</b>: | Sexual health                                                                                                                                                                                                                                                                                                                                                                                                                                                                                                                                                                                                                                                               |
| Secondary Subject Heading:      | Diagnostics                                                                                                                                                                                                                                                                                                                                                                                                                                                                                                                                                                                                                                                                 |
| Keywords:                       | neisseria gonorrhoeae, chlamydia trachomatis, screening, urine, pre-exposure prophylaxis, MSM                                                                                                                                                                                                                                                                                                                                                                                                                                                                                                                                                                               |
|                                 |                                                                                                                                                                                                                                                                                                                                                                                                                                                                                                                                                                                                                                                                             |

SCHOLARONE™  
Manuscripts

1  
2  
3  
4  
5 **EVALUATION OF THE “COLLI-PEE™”, A FIRST-VOID URINE**  
6  
7  
8  
9  
10 **COLLECTION DEVICE FOR SELF-SAMPLING AT HOME**  
11  
12  
13  
14 **FOR THE DETECTION OF SEXUALLY TRANSMITTED**  
15  
16  
17  
18 **INFECTIONS, VERSUS A ROUTINE CLINIC BASED URINE**  
19  
20  
21  
22  
23 **COLLECTION IN A ONE-TO-ONE COMPARISON STUDY**  
24  
25  
26  
27  
28 **DESIGN: EFFICACY AND ACCEPTABILITY AMONG MSM IN**  
29  
30  
31  
32 **BELGIUM**

33  
34  
35  
36  
37  
38  
39 Authors: De Baetselier Irith<sup>1</sup>, Smet Hilde<sup>1</sup>, Abdellati Saïd<sup>1</sup>, De Deken Bénédicte<sup>1</sup>, Cuylaerts Vicky<sup>1</sup>,  
40  
41 Reyniers Thijs<sup>2</sup>, Vuylsteke Bea<sup>2</sup>, Crucitti Tania<sup>1</sup>

42  
43  
44  
45 <sup>1</sup>Institute of Tropical Medicine, Department of Clinical Sciences, HIV/STI Reference Laboratory,  
46  
47 Antwerp, Belgium

48  
49  
50 <sup>2</sup>Institute of Tropical Medicine, Department of Public Health, HIV Sexual Unit, Antwerp, Belgium

51  
52  
53 Corresponding Author Details:

54  
55 Irith De Baetselier MSc.

56  
57 Institute of Tropical Medicine

58  
59 Nationalestraat 155  
60

1  
2  
3 2000 Antwerp  
4

5 Belgium  
6

7 Email: [idebaetselier@itg.be](mailto:idebaetselier@itg.be)  
8

9  
10 Telephone: +3232475444  
11

12 Wordcount excluding title page, abstract, references, figures and tables: 3332  
13  
14  
15  
16  
17  
18  
19  
20  
21  
22  
23  
24  
25  
26  
27  
28  
29  
30  
31  
32  
33  
34  
35  
36  
37  
38  
39  
40  
41  
42  
43  
44  
45  
46  
47  
48  
49  
50  
51  
52  
53  
54  
55  
56  
57  
58  
59  
60

For peer review only

## ABSTRACT:

Objectives: Pre-exposure prophylaxis (PrEP) users are screened bi-annual for Sexually Transmitted Infections (STIs). A novel device, called the Colli-Pee™, collects first-void urine in a standardized way and the collector tube can be easily delivered by regular post to a certified laboratory. The aim of the study was a one-to-one comparison between the STI test results obtained with the urine collected in the clinic, versus urine collected at home in a real-life setting by Men who have Sex with Men (MSM) in Belgium. The user-friendliness and acceptability of the Colli-Pee™ device by the users was also evaluated.

Design: A single-site nested sub-study in a prospective PrEP demonstration project (Be-PrEP-ared) among MSM in Belgium.

Participants: A total of 473 home-based samples from 213 MSM were received with a mean age of 38.5 years.

Interventions: Participants were requested to collect a urine sample at home using the Colli-Pee™ device and to send it to the laboratory via regular mail.

Primary and secondary outcome measures: The presence of *Chlamydia trachomatis* (CT), *Neisseria gonorrhoeae* (NG), *Mycoplasma genitalium* (MG) and *Trichomonas vaginalis* (TV) was determined using molecular amplification assays. Agreement between test results of samples collected at the clinic and collected at home were evaluated using Cohen's kappa statistic. Results: *Trichomonas vaginalis* was not detected. A very good to almost perfect agreement was found for CT, NG and MG of  $\kappa=0.75$ ; 0.87 and 0.85, respectively. Using the Colli-Pee™ device only one low positive CT and two MG infections were missed, however, three additional CT, two NG and six MG infections were detected.

1  
2  
3 Conclusions: The Colli-Pee™ device is a feasible and convenient way to collect urine at home for STI  
4 testing. This may be particularly relevant for populations that need frequent STI testing, such as PrEP  
5 users, and patients who prefer home-sampling.  
6  
7  
8  
9

10 Trial registration: Clinicaltrials.gov database: NCT02552914  
11  
12  
13

## 14 ARTICLE SUMMARY

### 17 Strengths and limitations of this study

- 20 • The study was designed as such to provide real-world experience concerning home-based  
21 sampling for STI detection including shipment by post among PrEP users.  
22
- 23 • Home-based and clinic-based samples were processed and analyzed using the same  
24 procedures and laboratory staff was blinded for the results of the matching sample.  
25
- 26 • The study was performed among MSM PrEP users who have a high prevalence of STIs.  
27
- 28 • Our main limitation is that home-based samples were not taken on the same day as clinic-  
29 based sampling and participants could have become positive during that window period.  
30
- 31 • Another limitation of the study is that the temperature during transportation of home-based  
32 samples to the clinic was not monitored.  
33  
34  
35  
36  
37  
38  
39  
40  
41

### 42 INTRODUCTION:

43  
44  
45  
46 According to the World Health Organisation's Global Health Sector Strategy on Sexually Transmitted  
47 Infections (STIs) 2016-2021, early diagnosis and linkage to treatment are one of the key elements for  
48 preventing further transmission of STIs.[1] Currently, first-void urine is still favoured as the sample of  
49 choice for the detection of *Chlamydia trachomatis* (CT) and *Neisseria gonorrhoeae* (NG) in men, using  
50 nucleic acid amplification tests (NAATs).[2–4] In general, a regular urine container is used to collect  
51 the first-void urine sample, but the collected volume of urine is not standardized. Furthermore, this  
52 type of container is less convenient for postal delivery to the laboratory. Another sponged-based  
53  
54  
55  
56  
57  
58  
59  
60



1  
2  
3 device (UriSWAB, Copan Diagnostics, Brescia, Italy) has been suggested as an alternative for postal  
4 delivery of urine. However, this device only holds 2 mL of urine and does not guarantee that only first-  
5 void urine is collected.[4,5] The CE-IVD labelled Colli-Pee™ device (Novosanis, Belgium), provides a  
6 clean and standardized solution to the above-mentioned issues as it efficiently captures first-void  
7 urine (20 mL) without interruption of the urine flow and allows the samples to be sent by post. (Fig 1)  
8 The Colli-Pee™ device is currently used for the detection of Human Papilloma Virus (HPV) and several  
9 urological cancers for which collection of first-void urine is essential.[6,7] In the field of STIs, a  
10 standardized first-void urine study reported that the organism load of *C. trachomatis* is maximal in the  
11 first 4-5 mL and that the performance of diagnostic tests improved when using only first-void  
12 urine.[8,9]

13  
14  
15  
16  
17  
18  
19  
20  
21  
22  
23  
24  
25  
26  
27  
28  
29 Although pre-exposure prophylaxis (PrEP) is becoming crucial in HIV prevention, recent reviews of  
30 real-world PrEP demonstration studies showed that PrEP is associated with increased diagnoses of  
31 STIs in Men who have Sex with Men (MSM).[10,11] Consequently, current guidelines recommend a  
32 bi-annual screening of STIs in PrEP users because of their high risk behaviour.[12,13]

33  
34  
35  
36  
37  
38  
39 In order to facilitate the patient flow during follow-up visits by PrEP users, and prompt treatment of  
40 STIs, home-based collection of first-void urine could be sent to the laboratory by regular mail for STI  
41 detection before the scheduled visit. STI results may then be available at the time of the physician  
42 consultation and in the case of a detected STI also immediately treated, limiting the risk of further  
43 transmission.

44  
45  
46  
47  
48  
49  
50 The objectives of this study were to compare the results of the molecular detection of several STIs  
51 using the Colli-Pee™ device versus a sample obtained in the clinic, the use and acceptability of the  
52 Colli-Pee™ device and its convenience for shipment by regular mail. To assess these objectives, a  
53 nested sub-study was performed among MSM who participated in a Belgian PrEP demonstration  
54 cohort. [14]

## METHODS:

The evaluation was undertaken as a sub-study of Be-PrEP-ared, a PrEP demonstration study among MSM at high risk for HIV in Belgium.

### The main study

The Be-PrEP-ared project (EudraCTn<sup>o</sup>: 5015-00005437) was a phase 3, single-site, open-label prospective cohort study where 200 MSM at high risk of acquiring HIV were asked to participate in the project and to take PrEP daily or event-driven. Detailed study methods are described elsewhere.[14] Participants were tested for *Neisseria gonorrhoeae* (NG), *Chlamydia trachomatis* (CT), *Mycoplasma genitalium* (MG) and *Trichomonas vaginalis* (TV) at baseline and every three months. Detection of these STIs was performed at the three biological sites: urethra, anorectum and pharynx. During each study visit, participants collected urine in two urine containers at the clinic as per the following instructions: urinate in the first container up to the marked line at approximately 20 mL, afterwards complete the second cup with no restrictions. Urine in the first container (hereafter the clinic-based sample) was weighed and thereafter stored refrigerated until analysis that took place within 48h. Urine in the second container was used to detect proteinuria.

### Laboratory procedures

In the first instance, CT/NG detection was performed using the Abbott Real Time (RT) CT/NG assay (DNA extraction and sample preparation using Abbott m2000sp and the Abbott m2000rt system for amplification and detection of CT/NG (Abbott Molecular Inc. Des Plaines, Illinois, USA)) according to manufacturer's instructions. The remainder of the urine and DNA extracts were stored at -80 °C. In

1  
2  
3 the case of positivity, the same DNA extracts were tested by in-house real time-PCR (RT-PCR) assays  
4 for CT and/or NG, both based on previously published primer sets.[15,16]. A sample was considered  
5  
6 for CT and/or NG, both based on previously published primer sets.[15,16]. A sample was considered  
7  
8 positive when positive in both the Abbott and the in-house RT-PCR. An initial positive Abbott assay  
9  
10 result followed by a negative confirmatory NAAT result was defined as 'not confirmed'. Inhibition of  
11  
12 the NAAT according to the Abbott assay was defined as 'inhibition'.  
13  
14

15 The same DNA extracts were used for further testing. MG was detected and reported using an  
16  
17 accredited in-house RT-PCR that targets the pdhD-gene [17] and in addition the DiaMGTV multiplex  
18  
19 kit (Diagenode diagnostics, Seraing, Belgium) that detects MG and TV simultaneously was used for TV  
20  
21 detection. The results for MG of the DiaMGTV multiplex kit were not used for reporting purposes and  
22  
23 are only provided for information only. No further confirmation of TV took place.  
24  
25  
26

### 27 **The Colli-Pee™ sub-study**

28  
29  
30 At the baseline visit of the Be-PrEP-ared study, participants were asked consent to participate in this  
31  
32 sub-study. After signing the informed consent form, they received a Colli-Pee™ device and a prepaid  
33  
34 envelope. They were instructed to collect first-void urine the next day at home using the Colli-Pee™  
35  
36 device (the home-based sample), to document the date and time of collection and to send the  
37  
38 collector tube filled with urine back to the laboratory by regular post, using the prepaid envelope.  
39  
40 Upon receipt in the laboratory, the urine was weighed, stored refrigerated (2-8°C) and CT, NG, MG,  
41  
42 TV was detected using the same NAATs within 48 hours. The urine and DNA extracts' remnants were  
43  
44 stored at -80°C. The quantity of human cells was measured at baseline using a human Endogenous  
45  
46 Retrovirus-3 (ERV-3) quantitative PCR on the paired clinic- and home-based samples.[18]  
47  
48  
49

50  
51 The lab technicians were blinded for the results obtained for the clinic-based sample. In addition, the  
52  
53 result of the home-based sample was not disclosed to the physician or participant.  
54  
55

56 During the next visit, which took place within 14 days after baseline, participants were asked to  
57  
58 complete a small survey (five questions only) on the user-friendliness and willingness to use the Colli-  
59  
60

1  
2  
3 Pee™ device (acceptability). Two questions documenting their opinion (likes-dislikes) of the Colli-  
4  
5 Pee™ device were open-ended.  
6  
7

8 At follow-up month 6 and month 18 of the study, Colli-Pee™ devices were again distributed to those  
9  
10 who agreed to participate and the survey was repeated at month 18 (results unreported).  
11  
12

13 The main study was approved by the Institutional Review Board of the Institute of Tropical Medicine  
14  
15 and the Ethics Committee of the Antwerp University Hospital. In addition, a separate approval for this  
16  
17 sub-study was obtained by the Institutional Review Board of the Institute of Tropical Medicine  
18  
19 (Ref:1027/15) and this sub-study is also registered in the clinicaltrials.gov database (NCT02552914).  
20  
21  
22

## 23 **Patient and Public Involvement**

24  
25 Patients were not involved in the Colli-Pee™ substudy. Patients were not invited to comment on the  
26  
27 study design and were not consulted to develop patient relevant outcomes or interpret the results.  
28  
29 Patients were not invited to contribute to the writing or editing of this document for readability or  
30  
31 accuracy.  
32  
33  
34  
35

## 36 **Statistical analysis**

37  
38 The agreement of the results of the molecular assays using each of the two sampling methods was  
39  
40 assessed by the use of Cohen's kappa statistic and percent agreement. Samples that were not  
41  
42 confirmed were coded as negative samples for the calculation of the agreement. The agreement of  
43  
44 volume of urine collected and the agreement of concentration of human DNA in both sampling  
45  
46 methods was assessed by using a t-test. A p-value of <0.05 was considered statistically significant.  
47  
48 Both analyses were performed using STATA version 15.0 (StataCorp LP, College Station, TX, USA).  
49  
50  
51  
52

53  
54 A descriptive analysis was made of the results of the self-administered questionnaire on the  
55  
56 acceptability and user-friendliness of the Colli-Pee™ device.  
57  
58  
59  
60

## RESULTS

### Demographics

The main study took place at the Institute of Tropical Medicine, Antwerp, Belgium from Sep 2015 until May 2018. Of the 219 participants who were screened for eligibility into the main study, six participants did not consent to the Colli-Pee™ sub-study. All participants who consented to the sub-study were MSM and three identified themselves as transwomen.[19] The mean age of the participants was 38.5 years (Interquartile Range 32-44). A total of 473 home-based samples from 213 participants were received. Two home-based samples could not be linked to the corresponding clinic-based sample and were therefore excluded, bringing the total number to 471. As shown in Table 1, the number of home-based samples received at the laboratory declined over time.

| Kind Of Visit | Clinic based | Home Based (% home-based samples received) |
|---------------|--------------|--------------------------------------------|
| Screening     | 218          | 187 (85.8%)                                |
| Month 6       | 191          | 152 (79.6%)                                |
| Month 18      | 179          | 132 (73.7%)                                |

Table 1: Number of clinic and home-based samples received during the study

Although the participants were instructed to report the urine collection date and hour on the collection device, only 72.8% (343/471) were labelled with collection date. Most of the home-based samples (79.6%) were taken within two days after the clinic-based sample and 3.8% were taken after 20 days (13/343) (median one day; min-max: 0-70 days). The median time between the collection of the home-based sample and its reception at the laboratory after postal return was five days (min-max: 0-27 days), 72.9% arrived at the laboratory within those five days, an additional 25.7% within 10 days and five samples were received after 10 days (11, 13, 15, 17 and 27 days respectively).

## Comparison of weight and concentration of human material between both sampling methods.

A total of 455 home-based and 423 clinic-based samples were weighed. The mean net weight of the home-based sample was  $19.68\text{g} \pm 2.14\text{g}$  (95%CI: 19.5g-19.9g and min-max: 6.81g-39.47g) vs  $22.87\text{g} \pm 13.64\text{g}$  (95%CI: 21.6g-24.2g and min-max: 2.88g - 86.23g) for the clinic-based sample ( $p < 0.001$ ).

The quantity of human cells was analysed at baseline only ( $n=187$ ). In a total of five home-based and one clinic-based sample ERV could not be detected and these samples were considered as lacking human material. After removal of the paired samples lacking ERV or containing inhibitors, 182 observations could be paired. The mean quantity of the clinic-based sample was  $11.3 \times 10^3$  cells/PCR (95%CI: 7.4 -  $15.2 \times 10^3$ ) and for the home-based sample  $14.2 \times 10^3$  cells/PCR (95% CI: 6.8- $21.5 \times 10^3$ ) ( $p > 0.05$ ).

## STI results and agreement

Of the 471 home-based samples with a matching visit, six home-based and one clinic-based sample gave inhibition and were excluded from the analysis ( $n=464$ ). The results are shown in Table 2.

| STI                | Home-based urine result | Clinic-based urine results |          |       |
|--------------------|-------------------------|----------------------------|----------|-------|
|                    |                         | Negative                   | Positive | Total |
| <i>Chlamydia</i>   | Negative                | 454*                       | 1        | 455   |
| <i>trachomatis</i> | Positive                | 3                          | 6        | 9     |
| (non-LGV)          | Total                   | 457                        | 7        | 464   |
| <i>Neisseria</i>   | Negative                | 455                        | 0        | 455   |

| STI                          | Home-based<br>urine result | Clinic-based urine results |          |       |
|------------------------------|----------------------------|----------------------------|----------|-------|
|                              |                            | Negative                   | Positive | Total |
| <i>gonorrhoeae</i>           | Positive                   | 2                          | 7        | 9     |
|                              | Total                      | 457                        | 7        | 464   |
| <i>Mycoplasma genitalium</i> | Negative                   | 431                        | 2        | 433   |
|                              | Positive                   | 6                          | 25       | 31    |
|                              | Total                      | 437                        | 27       | 464   |
| <i>Trichomonas vaginalis</i> | Negative                   | 464                        | 0        | 464   |
|                              | Positive                   | 0                          | 0        | 0     |
|                              | Total                      | 464                        | 0        | 464   |

Table 2: STI results of the home-based and clinic-based urine samples

\* Two result were not-confirmed in the clinic-based sample

*Trichomonas vaginalis* was not detected. Percent agreement (Cohen's kappa coefficient) for CT/NG/MG is 99.1% (0.75); 99.6% (0.87) and 98.3% (0.85), respectively, which indicates substantial agreement for *Chlamydia trachomatis* and almost perfect agreement for the other two STIs.

Tables 3 and 4 show the discordant results. For some of the home-based samples the date of collection was unknown so the time between the clinic visit and time of reception at the laboratory is depicted here. A delta-cycle (DC) value of the Abbott assay of less than two indicates a low positive infection.

| STI | DC value | Ct value in-house RT-PCR for CT, NG or MG* | Ct-value S-DiagMGTV RT-PCR (for information only) | Days between collection | Days of transport |
|-----|----------|--------------------------------------------|---------------------------------------------------|-------------------------|-------------------|
| CT  | 1.49     | 33.19                                      | NA                                                | 0                       | 2                 |
| MG  | NA       | 32.20                                      | Neg                                               | 3                       | 4                 |
| MG  | NA       | 32.04                                      | 37.44                                             | 0                       | 8                 |

Table 3: STI infections that were not detected in home-based urine samples

\*: a different in-house RT-PCR assay was used for CT, NG or MG

DC = delta cycle; Ct = Cycle threshold; NA = not applicable; Max = days between clinic visit and reception of the home-based sample at the laboratory

| STI | DC value | Ct value in-house RT-PCR for CT, NG or MG* | Ct-value S-DiagMGTV RT-PCR (for information only) | Days between collection | Days of transport |
|-----|----------|--------------------------------------------|---------------------------------------------------|-------------------------|-------------------|
| CT  | 3.99     | 34.26                                      | NA                                                | 1                       | 2                 |
| CT  | 2.68     | 35.31                                      | NA                                                | 1                       | 6                 |
| CT  | 0.27     | 36.06                                      | NA                                                | 6                       | 4                 |
| NG  | 2.93     | 37.58                                      | NA                                                | 8                       | 4                 |
| NG  | 10.08    | 25.26                                      | NA                                                | 2                       | 6                 |
| MG  | NA       | 31.28                                      | Neg                                               | Max 6                   | Max 6             |
| MG  | NA       | 31.96                                      | 40.51                                             | 1                       | 2                 |
| MG  | NA       | 28.66                                      | 34.67                                             | Max 3                   | Max 3             |
| MG  | NA       | 34.58                                      | 38.50                                             | 9                       | 4                 |
| MG  | NA       | 34.23                                      | Neg                                               | 1                       | 5                 |
| MG  | NA       | 32.04                                      | 38.14                                             | Max 3                   | Max 3             |

Table 4: STI infections that were additionally detected in home-based urine samples

\*: a different in-house RT-PCR assay was used for CT, NG or MG

DC = delta cycle; Ct = Cycle threshold; NA = not applicable; Max = days between clinic visit and reception of the home-based sample at the laboratory



## Acceptability and user-friendliness of the Colli-Pee™ device

A total of 164 participants provided feedback regarding the use of the Colli-Pee™ device at baseline.

On a scale of one to five, 87.8% found that the Colli-Pee™ device was easy to very easy to use.

Instructions on how to send the Colli-Pee™ device were found to be easy by 90.2% of the participants.

Four participants found the Colli-Pee™ difficult to use (2.4%) and four other participants found it difficult to follow the instructions (2.4%). Likes from participants were: the ease of use (54.9%), no interruption of the urine flow (15.9%), hygienic (11.6%) and privacy of the home-based sample collection (11.0%); the dislikes were: nothing (47.0%), not being recyclable (14.6%), not hygienic (10.4%) and being too large (6.1%).

To the question of whether they would order an online STI test, 89.0% answered positively (146/164) and 91.1% (133/146) of those individuals would use the Colli-Pee™ device in that case. Six participants (4.1%) would not want to use the Colli-Pee™ device when ordering an online STI test. Participants were also asked how much they would pay for an online STI test with self-sampling. Price indications ranged from 0€ (10 participants) to 60€. Most of the participants (89/164) were willing to pay 10-20€.

## DISCUSSION

Many studies have reported on male self-collected urine versus urethra clinician-collected sampling for STI screening, but 'real-world' studies, including sending of home-based urine samples for STI detection in men by post, are sparse.[4,5,20,21] In this study, we showed that the Colli-Pee™ collection device is a valuable and reliable method for collecting first-void urine for STI detection in MSM in Belgium, and that the collector can be shipped by regular post. Compared to the clinic-based sample, a total of three STIs (one CT and two MG infections) were not detected in the home-based sample. However, 11 additional infections were found in home-based samples collected with the Colli-

1  
2  
3 Pee™ device (3 CT, 2 NG and 6 MG infections). This high number of additional STIs could be explained  
4  
5 by the fact that first-void urine contains more DNA/RNA than mid-stream and, as a consequence,  
6  
7 should still be used for STI detection.[9] Indeed, we showed that using the Colli-Pee™ device first-void  
8  
9 urine was collected in a more standardized way compared to the clinic-based samples ( $p < 0.001$ ).  
10  
11 Also, more human cells were collected in the home-based samples, however statistical significance  
12  
13 was lacking. The fact that participants could become positive during the time in between sampling  
14  
15 points is one of our main limitations and cannot be ignored. Preliminary data of the Be-PrEP-ared  
16  
17 study showed high incidence estimates after twelve months of the main Be-PrEP-ared study for  
18  
19 urethral CT/NG and MG: 11.5, 5.1 and 6.9 incidence rate per 100 person-years respectively.  
20  
21  
22

23  
24 Nevertheless, the most important observation is that only one Chlamydia positive result was missed.  
25  
26 The DC value of the Abbott assay performed on that clinic-based sample highlighted the low bacterial  
27  
28 load of that infection; in addition, transportation at room temperature for two days could have  
29  
30 induced DNA degradation.  
31  
32

33  
34 The World Health Organisation (WHO) underlines the importance of integrating point-of-care assays  
35  
36 (POCTs) including innovative delivery options such as self-testing. [22] Unfortunately, to our  
37  
38 knowledge, current commercial POCTs for the most important STIs such as *Chlamydia trachomatis*  
39  
40 and *Neisseria gonorrhoeae* are still of sub-optimal quality and do not meet the ASSURED criteria that  
41  
42 were developed by the WHO STI Diagnostics Initiative.[22–25] A solution to the unavailability of  
43  
44 qualitative POCTs could be internet-accessed STI testing (e-STI testing) which is increasingly available  
45  
46 as an alternative to clinic testing all over the world.[26] E-STI testing includes postal self-sampling test  
47  
48 kits that are sent to a certified laboratory and web-based delivery of test results. Swab2Know, an  
49  
50 online HIV testing project confirmed that e-HIV testing is acceptable and feasible among MSM in  
51  
52 Belgium. [27] Commercial online self-sampling services for STIs are now emerging over the internet,  
53  
54 but evaluation of these services is lacking.  
55  
56  
57  
58  
59  
60

1  
2  
3 The present study is, however, subject to several limitations. Firstly, we only enrolled Be-PrEP-ared  
4 participants and the participation level seriously declined during the study. As a result, our number of  
5 CT/NG positives is quite low, which precludes firm conclusions. Secondly, as mentioned above, home-  
6 based samples were not taken on the same day as clinic-based sampling and participants could have  
7 become positive during that window period. We also do not know whether participants had urinated  
8 one hour prior to collection. However, recent data show that the time between micturition is not  
9 crucial for the detection of Chlamydia in men.[28] Thirdly, we did not monitor the temperature of the  
10 transport of home-based samples which could also have an impact on the quality of the samples,  
11 however, outside temperature between Oct 2015 and May 2018 varied between -10°C to 33°C with  
12 an average of 11°C.  
13  
14  
15  
16  
17  
18  
19  
20  
21  
22  
23  
24  
25

26 Fourthly, we cannot exclude specimen contamination, however, participants were instructed how to  
27 correctly collect the clinic-based and home-based sample. Finally, reporting bias is also not to be  
28 excluded. Not all participants who used a Colli-Pee™ device completed the survey, the additional  
29 questions were included at the end of the lengthy main questionnaire of the Be-PrEP-ared study.  
30  
31  
32  
33  
34  
35

36 Besides PrEP users, e-STI testing has the potential to reach those who are most in need and a recent  
37 study showed that some higher-risk groups, such as MSM, were more likely to use online services  
38 [26,29]. Many studies have shown that home-based sampling is well accepted and, in fact, is the  
39 preferred approach in these groups for STIs. Reasons for choosing home-based sampling were shorter  
40 waiting times for results, convenience and less embarrassment. [30] Participants views regarding  
41 ordering an online STI test in this study were very positive, 89% would like to order such a kit. The  
42 Colli-Pee™ device was also found to be easy (90.2%) and although hygiene was one of the likes, it also  
43 appeared in the dislikes, probably because the need to detach the collector manually can cause  
44 leakage of urine. Participants were also concerned regarding possible ecological consequences,  
45 although the plastic material is recyclable and can be incinerated into energy.  
46  
47  
48  
49  
50  
51  
52  
53  
54  
55  
56  
57  
58  
59  
60

1  
2  
3 We demonstrated that postal delivery of home-based collected urine does not influence STI detection  
4 and can be used among PrEP users. Subsequently, PrEP users will be able to send first-void urine to  
5 the laboratory with the Colli-Pee™ device one to two weeks before their routine PrEP follow up visit.  
6  
7 Results can then be discussed during the physician consultation and followed by treatment and future  
8 antimicrobial testing if applicable, decreasing the number of physician visits. Decreasing the number  
9 of face-to-face visits will lower the burden on staff workload and healthcare resources. However,  
10 future economic evaluations will need to be conducted to prove this statement. E-STI testing could be  
11 a promising approach in Belgium to reach patients in hard-to-reach populations and research on this  
12 topic should be stimulated. Therefore, future studies to study the acceptability and impact of postal  
13 shipment of home-collected material on the performance of STI assays requires additional  
14 assessment.  
15  
16  
17  
18  
19  
20  
21  
22  
23  
24  
25  
26  
27  
28  
29  
30

31 Figure legend: Fig 1: The Colli-Pee™ device instructions for use.  
32

## 33 34 35 **ACKNOWLEDGEMENTS** 36 37 38

39 We would like to thank all the participants of the Be-PrEP-ared study who participated in this small  
40 study. We also would like to thank Be-PrEP-ared study group but especially Maureen Aerts who was  
41 crucial in the participation level of this study. Finally we would like to thank Wendy Thys for the data  
42 entry.  
43  
44  
45  
46  
47  
48

## 49 50 **COMPETING INTERESTS STATEMENT** 51 52 53

54 The authors have no competing interests to declare.  
55  
56  
57  
58  
59  
60

## FUNDING STATEMENT

This work was supported by Novosanis who provided the Colli-Pee™ devices and partially paid for the analyses performed on the home-based samples. In addition, a grant was obtained from the Flemish Agency for Innovation and Entrepreneurship to conduct the Be-PrEP-ared study.

## DATASHARING STATEMENT

The data will be made publicly available except for the use and acceptability data as these will be retained at the Institute of Tropical Medicine (ITM), Antwerp due to ethical and privacy concerns. According to the ITM research data sharing policy, only fully anonymised data can be shared publicly. The data can however be made available after approval of a motivated and written request to the ITM at ITMresearchdataaccess@itg.be. The ITM data access committee will verify if the dataset is suitable for obtaining the study objective and assure that confidentiality and ethical requirements are in place.

## CONTRIBUTORSHIP STATEMENT

IDB, TC, and BV designed the study. TR designed the acceptability survey. IDB performed the statistical analysis and wrote the first draft of the manuscript. HS, BDD, VC, SA performed testing. All authors read the final version of the manuscript and provided comments.

## REFERENCES

- 1 WHO. Global Health Sector Strategy on Sexually Transmitted Infections 2016-2021. *World Heal Organ* 2016;**1**:63. doi:10.1055/s-2007-970201.
- 2 Lanjouw E, Ouburg S, de Vries H, *et al*. 2015 European guideline on the management of *Chlamydia trachomatis* infections. *Int J STD AIDS* 2016;**27**:333–48.

- 1  
2  
3 doi:10.1177/0956462415618837  
4  
5  
6 3 Bignell C, Unemo M, Radcliffe K, *et al.* 2012 European guideline on the diagnosis and  
7  
8 treatment of gonorrhoea in adults. *Int J STD AIDS* 2013;**24**:85–92.  
9  
10 doi:10.1177/0956462412472837  
11  
12  
13 4 Lunny C, Taylor D, Hoang L, *et al.* Self-Collected versus Clinician-Collected Sampling for  
14  
15 Chlamydia and Gonorrhoea Screening: A Systemic Review and Meta-Analysis. *PLoS One*  
16  
17 2015;**10**:e0132776. doi:10.1371/journal.pone.0132776  
18  
19  
20  
21 5 McNicol J, Debattista J. Use of the UriSwab collection device for testing of *Chlamydia*  
22  
23 *trachomatis* and *Neisseria gonorrhoeae* : implications for a postal testing service. *Int J STD*  
24  
25 *AIDS* 2013;**24**:477–80. doi:10.1177/0956462412472834  
26  
27  
28 6 Vorsters A, Van den Bergh J, Micalessi I, *et al.* Optimization of HPV DNA detection in urine by  
29  
30 improving collection, storage, and extraction. *Eur J Clin Microbiol Infect Dis* 2014;**33**:2005–14.  
31  
32 doi:10.1007/s10096-014-2147-2  
33  
34  
35 7 Theodorescu D, Schiffer E, Bauer HW, *et al.* Discovery and validation of urinary biomarkers for  
36  
37 prostate cancer. *Proteomics Clin Appl* 2008;**2**:556–70. doi:10.1002/prca.200780082  
38  
39  
40 8 Wisniewski CA, White JA, Michel C-EC, *et al.* Optimal method of collection of first-void urine  
41  
42 for diagnosis of *Chlamydia trachomatis* infection in men. *J Clin Microbiol* 2008;**46**:1466–9.  
43  
44 doi:10.1128/JCM.02241-07  
45  
46  
47 9 Johnson DJ, Calderaro AC, Roberts KA. Variation in Nuclear DNA Concentrations During  
48  
49 Urination. *J Forensic Sci* 2007;**52**:110–3. doi:10.1111/j.1556-4029.2006.00329.x  
50  
51  
52  
53 10 Traeger MW, Schroeder SE, Wright EJ, *et al.* Effects of Pre-exposure Prophylaxis for the  
54  
55 Prevention of Human Immunodeficiency Virus Infection on Sexual Risk Behavior in Men Who  
56  
57 Have Sex With Men: A Systematic Review and Meta-analysis. *Clin Infect Dis* Published Online  
58  
59 First: 2 March 2018. doi:10.1093/cid/ciy182  
60

- 1  
2  
3 11 Kojima N, Davey DJ, Klausner JD. Pre-exposure prophylaxis for human immunodeficiency  
4 virus and sexually transmitted infection acquisition among men who have sex with men. *AIDS*  
5  
6 Published Online First: 2016. doi:10.1097/QAD.0000000000001185  
7  
8  
9  
10  
11 12 Salazar NAMEJ. EACS HIV guidelines 8.1. 2016.  
12  
13  
14 13 WHO implementation tool for pre-exposure prophylaxis (PrEP) of HIV infection. *Geneva*  
15  
16 *World Heal Organ* Published Online First: 2017.[http://www.who.int/hiv/pub/prep/prep-](http://www.who.int/hiv/pub/prep/prep-implementation-tool/en/)  
17  
18 [implementation-tool/en/](http://www.who.int/hiv/pub/prep/prep-implementation-tool/en/) (accessed 21 Aug 2018).  
19  
20  
21 14 De Baetselier I, Reyniers T, Nöstlinger C, *et al.* Pre-Exposure Prophylaxis (PrEP) as an  
22  
23 Additional Tool for HIV Prevention Among Men Who Have Sex With Men in Belgium: The Be-  
24  
25 PrEP-ared Study Protocol. *JMIR Res Protoc* 2017;**6**:e11. doi:10.2196/resprot.6767  
26  
27  
28 15 Chen C-Y, Chi KH, Alexander S, *et al.* A real-time quadriplex PCR assay for the diagnosis of  
29  
30 rectal lymphogranuloma venereum and non-lymphogranuloma venereum Chlamydia  
31  
32 trachomatis infections. *Sex Transm Infect* 2008;**84**:273–6. doi:10.1136/sti.2007.029058  
33  
34  
35 16 Hopkins MJ, Ashton LJ, Alloba F, *et al.* Validation of a laboratory-developed real-time PCR  
36  
37 protocol for detection of Chlamydia trachomatis and Neisseria gonorrhoeae in urine. *Sex*  
38  
39 *Transm Infect* 2010;**86**:207–11. doi:10.1136/sti.2009.040634  
40  
41  
42  
43 17 Müller EE, Venter JME, Magooa MP, *et al.* Development of a rotor-gene real-time PCR assay  
44  
45 for the detection and quantification of Mycoplasma genitalium. *J Microbiol Methods*  
46  
47 2012;**88**:311–5. doi:10.1016/j.mimet.2011.12.017  
48  
49  
50 18 Yuan CC, Miley W, Waters D. A quantification of human cells using an ERV-3 real time PCR  
51  
52 assay. *J Virol Methods* 2001;**91**:109–17.  
53  
54  
55 19 Reyniers T, Nöstlinger C, Laga M, *et al.* Choosing between daily and event-driven Pre-  
56  
57 Exposure Prophylaxis: results of a Belgian PrEP demonstration project Conflict of Interest and  
58  
59 Source of Funding: A grant was obtained from the Flemish Agency for. *JAIDS J Acquir Immune*  
60

- 1  
2  
3 *Defic Syndr Publ Ahead Print* doi:10.1097/QAI.0000000000001791  
4  
5  
6 20 Morré SA, van Valkengoed IG, de Jong A, *et al.* Mailed, home-obtained urine specimens: a  
7  
8 reliable screening approach for detecting asymptomatic Chlamydia trachomatis infections. *J*  
9  
10 *Clin Microbiol* 1999;**37**:976–80.<http://www.ncbi.nlm.nih.gov/pubmed/10074512> (accessed  
11  
12 21 Aug 2018).
- 13  
14  
15 21 Fajardo-Bernal L, Aponte-Gonzalez J, Vigil P, *et al.* Home-based versus clinic-based specimen  
16  
17 collection in the management of Chlamydia trachomatis and Neisseria gonorrhoeae  
18  
19 infections. *Cochrane Database Syst Rev* 2015;:CD011317.  
20  
21 doi:10.1002/14651858.CD011317.pub2  
22  
23  
24  
25 22 Toskin I, Blondeel K, Peeling RW, *et al.* Advancing point of care diagnostics for the control and  
26  
27 prevention of STIs: the way forward. *Sex Transm Infect* 2017;**93**:S81–8. doi:10.1136/sextrans-  
28  
29 2016-053073  
30  
31  
32  
33 23 De Baetselier I, Mwambarangwe L, Cuylaerts V, *et al.* Evaluation of an enzymatic Chlamydia  
34  
35 trachomatis point-of-care rapid assay in Rwanda: the BioChekSwab Rapid Test. *Sex Transm*  
36  
37 *Infect* Published Online First: 16 October 2015. doi:10.1136/sextrans-2015-052202  
38  
39  
40  
41 24 Peeling RW, Holmes KK, Mabey D, *et al.* Rapid tests for sexually transmitted infections (STIs):  
42  
43 the way forward. *Sex Transm Infect* 2006;**82**:v1–6. doi:10.1136/sti.2006.024265  
44  
45  
46 25 European Centre for Disease Prevention and Control. Novel approaches to testing for sexually  
47  
48 transmitted infections, including HIV and hepatitis B and C in Europe. Stockholm: 2012.  
49  
50 doi:10.2900/6481  
51  
52  
53 26 Wilson E, Free C, Morris TP, *et al.* Internet-accessed sexually transmitted infection (e-STI)  
54  
55 testing and results service: A randomised, single-blind, controlled trial. *PLOS Med*  
56  
57 2017;**14**:e1002479. doi:10.1371/journal.pmed.1002479  
58  
59  
60 27 Platteau T, Fransen K, Apers L, *et al.* Swab2know: An HIV-Testing Strategy Using Oral Fluid



- 1  
2  
3 Samples and Online Communication of Test Results for Men Who Have Sex With Men in  
4  
5 Belgium. *J Med Internet Res* 2015;**17**:e213. doi:10.2196/jmir.4384  
6  
7  
8 28 Mathew T, O'Mahony C, Mallinson H. Shortening the voiding interval for men having  
9  
10 chlamydia nucleic acid amplification tests. *Int J STD AIDS* 2009;**20**:752–3.  
11  
12 doi:10.1258/ijisa.2009.009225  
13  
14  
15 29 Barnard S, Free C, Bakolis I, *et al*. Comparing the characteristics of users of an online service  
16  
17 for STI self-sampling with clinic service users: a cross-sectional analysis. *Sex Transm Infect*  
18  
19 2018;;sextrans-2017-053302. doi:10.1136/sextrans-2017-053302  
20  
21  
22  
23 30 Paudyal P, Llewellyn C, Lau J, *et al*. Obtaining self-samples to diagnose curable sexually  
24  
25 transmitted infections: a systematic review of patients' experiences. *PLoS One*  
26  
27 2015;**10**:e0124310. doi:10.1371/journal.pone.0124310  
28  
29  
30  
31  
32  
33  
34  
35  
36  
37  
38  
39  
40  
41  
42  
43  
44  
45  
46  
47  
48  
49  
50  
51  
52  
53  
54  
55  
56  
57  
58  
59  
60

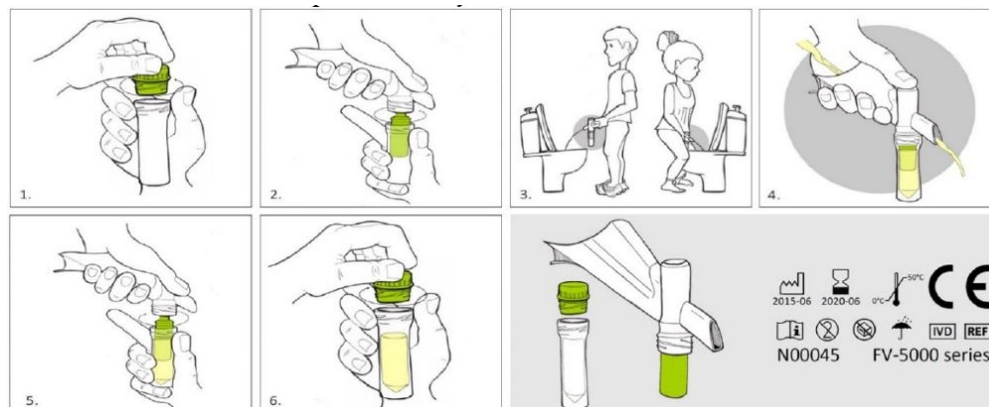

Fig 1: The Colli-Pee™ device instructions for use.

268x110mm (95 x 95 DPI)

| Section & Topic          | No         | Item                                                                                                                                                   | Reported on page #                                                                           |
|--------------------------|------------|--------------------------------------------------------------------------------------------------------------------------------------------------------|----------------------------------------------------------------------------------------------|
| <b>TITLE OR ABSTRACT</b> |            |                                                                                                                                                        |                                                                                              |
|                          | <b>1</b>   | Identification as a study of diagnostic accuracy using at least one measure of accuracy (such as sensitivity, specificity, predictive values, or AUC)  | 2 (agreement was used as this is not a diagnostic study)                                     |
| <b>ABSTRACT</b>          |            |                                                                                                                                                        |                                                                                              |
|                          | <b>2</b>   | Structured summary of study design, methods, results, and conclusions (for specific guidance, see STARD for Abstracts)                                 | 2                                                                                            |
| <b>INTRODUCTION</b>      |            |                                                                                                                                                        |                                                                                              |
|                          | <b>3</b>   | Scientific and clinical background, including the intended use and clinical role of the index test                                                     | 3-4                                                                                          |
|                          | <b>4</b>   | Study objectives and hypotheses                                                                                                                        | 4                                                                                            |
| <b>METHODS</b>           |            |                                                                                                                                                        |                                                                                              |
| <i>Study design</i>      | <b>5</b>   | Whether data collection was planned before the index test and reference standard were performed (prospective study) or after (retrospective study)     | 5                                                                                            |
| <i>Participants</i>      | <b>6</b>   | Eligibility criteria                                                                                                                                   | 5                                                                                            |
|                          | <b>7</b>   | On what basis potentially eligible participants were identified (such as symptoms, results from previous tests, inclusion in registry)                 | 5-6                                                                                          |
|                          | <b>8</b>   | Where and when potentially eligible participants were identified (setting, location and dates)                                                         | 5                                                                                            |
|                          | <b>9</b>   | Whether participants formed a consecutive, random or convenience series                                                                                | 5-6                                                                                          |
| <i>Test methods</i>      | <b>10a</b> | Index test, in sufficient detail to allow replication                                                                                                  | Not applicable same assay was used on both samples (but different kind of sample)            |
|                          | <b>10b</b> | Reference standard, in sufficient detail to allow replication                                                                                          | Not applicable same assay was used on both samples (but different kind of sample)            |
|                          | <b>11</b>  | Rationale for choosing the reference standard (if alternatives exist)                                                                                  | Not applicable same assay was used on both samples (but different kind of sample)            |
|                          | <b>12a</b> | Definition of and rationale for test positivity cut-offs or result categories of the index test, distinguishing pre-specified from exploratory         | 5-6                                                                                          |
|                          | <b>12b</b> | Definition of and rationale for test positivity cut-offs or result categories of the reference standard, distinguishing pre-specified from exploratory | 5-6                                                                                          |
|                          | <b>13a</b> | Whether clinical information and reference standard results were available to the performers/readers of the index test                                 | 6                                                                                            |
|                          | <b>13b</b> | Whether clinical information and index test results were available to the assessors of the reference standard                                          | 6                                                                                            |
| <i>Analysis</i>          | <b>14</b>  | Methods for estimating or comparing measures of diagnostic accuracy                                                                                    | 7                                                                                            |
|                          | <b>15</b>  | How indeterminate index test or reference standard results were handled                                                                                | 6                                                                                            |
|                          | <b>16</b>  | How missing data on the index test and reference standard were handled                                                                                 | Not applicable                                                                               |
|                          | <b>17</b>  | Any analyses of variability in diagnostic accuracy, distinguishing pre-specified from exploratory                                                      | Not applicable                                                                               |
|                          | <b>18</b>  | Intended sample size and how it was determined                                                                                                         | Not applicable                                                                               |
| <b>RESULTS</b>           |            |                                                                                                                                                        |                                                                                              |
| <i>Participants</i>      | <b>19</b>  | Flow of participants, using a diagram                                                                                                                  | We did not include of flow of participants, however this has been discussed in the text p7-8 |

|    |                          |            |                                                                                                             |                                     |
|----|--------------------------|------------|-------------------------------------------------------------------------------------------------------------|-------------------------------------|
| 1  |                          | <b>20</b>  | Baseline demographic and clinical characteristics of participants                                           | 7-8                                 |
| 2  |                          | <b>21a</b> | Distribution of severity of disease in those with the target condition                                      | Not applicable                      |
| 3  |                          | <b>21b</b> | Distribution of alternative diagnoses in those without the target condition                                 | Not applicable                      |
| 4  |                          | <b>22</b>  | Time interval and any clinical interventions between index test and reference standard                      | 8                                   |
| 5  | <i>Test results</i>      | <b>23</b>  | Cross tabulation of the index test results (or their distribution) by the results of the reference standard | 8                                   |
| 6  |                          | <b>24</b>  | Estimates of diagnostic accuracy and their precision (such as 95% confidence intervals)                     | Cohen's kappa agreement was used p9 |
| 7  |                          | <b>25</b>  | Any adverse events from performing the index test or the reference standard                                 | Not applicable                      |
| 8  |                          |            |                                                                                                             |                                     |
| 9  |                          |            |                                                                                                             |                                     |
| 10 |                          | <b>25</b>  | Any adverse events from performing the index test or the reference standard                                 | Not applicable                      |
| 11 | <b>DISCUSSION</b>        |            |                                                                                                             |                                     |
| 12 |                          | <b>26</b>  | Study limitations, including sources of potential bias, statistical uncertainty, and generalisability       | 13                                  |
| 13 |                          | <b>27</b>  | Implications for practice, including the intended use and clinical role of the index test                   | 13-14                               |
| 14 |                          |            |                                                                                                             |                                     |
| 15 | <b>OTHER INFORMATION</b> |            |                                                                                                             |                                     |
| 16 |                          |            |                                                                                                             |                                     |
| 17 |                          | <b>28</b>  | Registration number and name of registry                                                                    | 6                                   |
| 18 |                          | <b>29</b>  | Where the full study protocol can be accessed                                                               | Will be added as appendix           |
| 19 |                          | <b>30</b>  | Sources of funding and other support; role of funders                                                       | 15                                  |
| 20 |                          |            |                                                                                                             |                                     |
| 21 |                          |            |                                                                                                             |                                     |
| 22 |                          |            |                                                                                                             |                                     |
| 23 |                          |            |                                                                                                             |                                     |
| 24 |                          |            |                                                                                                             |                                     |
| 25 |                          |            |                                                                                                             |                                     |
| 26 |                          |            |                                                                                                             |                                     |
| 27 |                          |            |                                                                                                             |                                     |
| 28 |                          |            |                                                                                                             |                                     |
| 29 |                          |            |                                                                                                             |                                     |
| 30 |                          |            |                                                                                                             |                                     |
| 31 |                          |            |                                                                                                             |                                     |
| 32 |                          |            |                                                                                                             |                                     |
| 33 |                          |            |                                                                                                             |                                     |
| 34 |                          |            |                                                                                                             |                                     |
| 35 |                          |            |                                                                                                             |                                     |
| 36 |                          |            |                                                                                                             |                                     |
| 37 |                          |            |                                                                                                             |                                     |
| 38 |                          |            |                                                                                                             |                                     |
| 39 |                          |            |                                                                                                             |                                     |
| 40 |                          |            |                                                                                                             |                                     |
| 41 |                          |            |                                                                                                             |                                     |
| 42 |                          |            |                                                                                                             |                                     |
| 43 |                          |            |                                                                                                             |                                     |
| 44 |                          |            |                                                                                                             |                                     |
| 45 |                          |            |                                                                                                             |                                     |
| 46 |                          |            |                                                                                                             |                                     |
| 47 |                          |            |                                                                                                             |                                     |
| 48 |                          |            |                                                                                                             |                                     |
| 49 |                          |            |                                                                                                             |                                     |
| 50 |                          |            |                                                                                                             |                                     |
| 51 |                          |            |                                                                                                             |                                     |
| 52 |                          |            |                                                                                                             |                                     |
| 53 |                          |            |                                                                                                             |                                     |
| 54 |                          |            |                                                                                                             |                                     |
| 55 |                          |            |                                                                                                             |                                     |
| 56 |                          |            |                                                                                                             |                                     |
| 57 |                          |            |                                                                                                             |                                     |
| 58 |                          |            |                                                                                                             |                                     |
| 59 |                          |            |                                                                                                             |                                     |
| 60 |                          |            |                                                                                                             |                                     |

# STARD 2015

---

## AIM

STARD stands for “Standards for Reporting Diagnostic accuracy studies”. This list of items was developed to contribute to the completeness and transparency of reporting of diagnostic accuracy studies. Authors can use the list to write informative study reports. Editors and peer-reviewers can use it to evaluate whether the information has been included in manuscripts submitted for publication.

---

## EXPLANATION

A **diagnostic accuracy study** evaluates the ability of one or more medical tests to correctly classify study participants as having a **target condition**. This can be a disease, a disease stage, response or benefit from therapy, or an event or condition in the future. A medical test can be an imaging procedure, a laboratory test, elements from history and physical examination, a combination of these, or any other method for collecting information about the current health status of a patient.

The test whose accuracy is evaluated is called **index test**. A study can evaluate the accuracy of one or more index tests. Evaluating the ability of a medical test to correctly classify patients is typically done by comparing the distribution of the index test results with those of the **reference standard**. The reference standard is the best available method for establishing the presence or absence of the target condition. An accuracy study can rely on one or more reference standards.

If test results are categorized as either positive or negative, the cross tabulation of the index test results against those of the reference standard can be used to estimate the **sensitivity** of the index test (the proportion of participants *with* the target condition who have a positive index test), and its **specificity** (the proportion *without* the target condition who have a negative index test). From this cross tabulation (sometimes referred to as the contingency or “2x2” table), several other accuracy statistics can be estimated, such as the positive and negative **predictive values** of the test. Confidence intervals around estimates of accuracy can then be calculated to quantify the statistical **precision** of the measurements.

If the index test results can take more than two values, categorization of test results as positive or negative requires a **test positivity cut-off**. When multiple such cut-offs can be defined, authors can report a receiver operating characteristic (ROC) curve which graphically represents the combination of sensitivity and specificity for each possible test positivity cut-off. The **area under the ROC curve** informs in a single numerical value about the overall diagnostic accuracy of the index test.

The **intended use** of a medical test can be diagnosis, screening, staging, monitoring, surveillance, prediction or prognosis. The **clinical role** of a test explains its position relative to existing tests in the clinical pathway. A replacement test, for example, replaces an existing test. A triage test is used before an existing test; an add-on test is used after an existing test.

Besides diagnostic accuracy, several other outcomes and statistics may be relevant in the evaluation of medical tests. Medical tests can also be used to classify patients for purposes other than diagnosis, such as staging or prognosis. The STARD list was not explicitly developed for these other outcomes, statistics, and study types, although most STARD items would still apply.

---

## DEVELOPMENT

This STARD list was released in 2015. The 30 items were identified by an international expert group of methodologists, researchers, and editors. The guiding principle in the development of STARD was to select items that, when reported, would help readers to judge the potential for bias in the study, to appraise the applicability of the study findings and the validity of conclusions and recommendations. The list represents an update of the first version, which was published in 2003.

More information can be found on <http://www.equator-network.org/reporting-guidelines/stard>.



Supplement: bmjopen-2018-028145.reviewer_comments.pdf [file bmjopen-2018-028145.reviewer_comments.pdf]
